# 1 **A large-scale neural network training framework for generalized estimation of single-trial population dynamics**

2 Mohammad Reza Keshtkaran<sup>1,+</sup>, Andrew R. Sedler<sup>2,1,+</sup>, Raed H. Chowdhury<sup>3,4,^</sup>, Raghav Tandon<sup>1,^</sup>, Diya Basrai<sup>1,5</sup>,  
3 Sarah L. Nguyen<sup>6</sup>, Hansem Sohn<sup>7</sup>, Mehrdad Jazayeri<sup>7</sup>, Lee E. Miller<sup>8,4,9,10</sup>, Chethan Pandarinath<sup>1,11,2\*</sup>

4  
5 1. Wallace H. Coulter Department of Biomedical Engineering, Emory University and Georgia Institute of Technology, Atlanta, GA,  
6 USA

7 2. Center for Machine Learning, Georgia Institute of Technology, Atlanta, GA, USA

8 3. Department of Biomedical Engineering, Northwestern University, Evanston, IL, USA

9 4. Department of Bioengineering, University of Pittsburgh, Pittsburgh, PA, USA

10 5. Physiology and Neuroscience, University of California San Diego, La Jolla, CA, USA

11 6. College of Computing, Georgia Institute of Technology, Atlanta, GA, USA

12 7. Department of Brain and Cognitive Sciences, McGovern Institute for Brain Research, Massachusetts Institute of Technology,  
13 Cambridge, MA, USA

14 8. Department of Physiology, Northwestern University, Chicago, IL, USA

15 9. Department of Physical Medicine and Rehabilitation, Northwestern University, Chicago, IL, USA

16 10. Shirley Ryan AbilityLab, Chicago, IL, USA

17 11. Department of Neurosurgery, Emory University, Atlanta, GA, USA

18 + Authors contributed equally

19 ^ Authors contributed equally

20 \* Correspondence: chethan [at] gatech.edu

## 21 22 **Abstract**

23 Large-scale recordings of neural activity are providing new opportunities to study network-level dynamics. However, the  
24 sheer volume of data and its dynamical complexity are critical barriers to uncovering and interpreting these dynamics.  
25 Deep learning methods are a promising approach due to their ability to uncover meaningful relationships from large,  
26 complex, and noisy datasets. When applied to high-D spiking data from motor cortex (M1) during stereotyped behaviors,  
27 they offer improvements in the ability to uncover dynamics and their relation to subjects' behaviors on a millisecond  
28 timescale. However, applying such methods to less-structured behaviors, or in brain areas that are not well-modeled by  
29 autonomous dynamics, is far more challenging, because deep learning methods often require careful hand-tuning of  
30 complex model hyperparameters (HPs). Here we demonstrate AutoLFADS, a large-scale, automated model-tuning  
31 framework that can characterize dynamics in diverse brain areas without regard to behavior. AutoLFADS uses distributed  
32 computing to train dozens of models simultaneously while using evolutionary algorithms to tune HPs in a completely  
33 unsupervised way. This enables accurate inference of dynamics out-of-the-box on a variety of datasets, including data  
34 from M1 during stereotyped and free-paced reaching, somatosensory cortex during reaching with perturbations, and  
35 frontal cortex during cognitive timing tasks. We present a cloud software package and comprehensive tutorials that  
36 enable new users to apply the method without needing dedicated computing resources.

## 37 38 **Introduction**

39 Ongoing advances in neural interfacing technologies are enabling simultaneous monitoring of the activity of large neural  
40 populations across a wide array of brain areas and behaviors (1–5). Such technologies may fundamentally change the  
41 questions we can address about computations within a neural population, allowing neuroscientists to shift focus from  
42 understanding how individual neurons' activity relates to externally-measurable or controllable parameters, toward  
43 understanding how neurons within a network coordinate their activity to perform computations underlying those  
44 behaviors. A natural method for interpreting these complex, high-dimensional datasets is that of neural population  
45 dynamics (6–8). The dynamical systems framework centers on uncovering coordinated patterns of activation across a  
46 neural population and characterizing how these patterns change over time. Knowledge of these hidden dynamics has  
47 provided new insights into how neural populations implement the computations necessary for motor, sensory, and  
48 cognitive processes (9–15).

49 A focus on population dynamics could also facilitate a shift away from reliance on stereotyped behaviors and trial-  
50 averaged neural responses. Standard approaches must typically average activity across trials, sacrificing single trial  
51 interpretability for robustness against what is perceived as noise in single trials. However, as articulated by Cunningham  
52 and Yu (16): "If the neural activity is not a direct function of externally measurable or controllable variables (for example,  
53 if activity is more a reflection of internal processing than stimulus drive or measurable behavior), the time course of  
54

55 neural responses may differ substantially on nominally identical trials.” This may be especially true of non-primary cortical  
56 areas, and cognitively demanding tasks that involve decision-making, allocation of attention, or varying levels of  
57 motivation.

58  
59 To move beyond this bottleneck, high-time resolution single-trial analyses are essential. These can be enabled by a  
60 combination of neural population recordings and novel analytical tools like those proposed here. Single-trial, population-  
61 level analyses benefit from two principles of the dynamical systems view: first, that simultaneously recorded neurons are  
62 not independent, but rather exhibit coordinated patterns of activation that reflect the state of the overall network rather  
63 than individual neurons. Second, the coordinated patterns evolve over time in ways that are largely predictable based  
64 on the population’s internal dynamics. Thus, while it may be challenging to accurately estimate the network’s state based  
65 solely on activity observed at a single time point, knowledge of how the state evolves can constrain an estimate at any  
66 given time point.

67  
68 Several approaches have been developed to infer latent dynamical structure from neural population activity on individual  
69 trials, including a growing number that leverage artificial neural networks (17–22). One such method, latent factor  
70 analysis via dynamical systems (LFADS) (22,20) achieved precise inference of motor cortical firing rates on single trials  
71 of stereotyped behaviors, enabling accurate prediction of subjects’ behaviors on a moment-by-moment, millisecond  
72 timescale (20). Further, in tasks with unpredictable events, a modified network architecture enabled inference of  
73 dynamical perturbations that corresponded to how subjects ultimately responded to the unpredictable events.

74  
75 Though highly effective, artificial neural networks, including LFADS, typically have many thousands of parameters, and  
76 potentially dozens of non-trainable hyperparameters (HPs) that need to be tuned to achieve good performance. HPs  
77 include architecture parameters like the type, dimensionality, and number of various layers, as well as regularization and  
78 optimization parameters. Until recently, the HP optimization problem was typically addressed by an iterative manual  
79 process, a random search, or some combination of the two. In the past several years, a host of more advanced  
80 approaches promises to eliminate the tedious work and domain knowledge required for manual tuning while performing  
81 better and more efficiently than random search (23–25). The form and variety of possible neuroscientific datasets present  
82 unique challenges that make HP optimization a particularly impactful problem (26). Thus, bringing efficient HP search  
83 algorithms to neuroscience could allow more effective experimentation with models based on artificial neural networks,  
84 like LFADS.

85  
86 Here we present AutoLFADS, a framework for large-scale, automated model tuning that enables accurate single-trial  
87 inference of neural population dynamics across a range of brain areas and behaviors. We evaluate AutoLFADS using  
88 data from three cortical regions: primary motor and dorsal premotor cortex (M1/PMd), somatosensory cortex area 2, and  
89 dorsomedial frontal cortex (DMFC). The tasks span a mix of functions where population activity can be well-modeled by  
90 autonomous dynamics (e.g., pre-planned reaching movements, estimation of elapsed time) and those for which  
91 population activity is responsive to external inputs (e.g., mechanical perturbations, unexpected appearance of reaching  
92 targets, variable timing cues).

93  
94 Using this broad range of datasets, we show that AutoLFADS achieves high-time resolution, single-trial inference of  
95 neural population dynamics, surpassing LFADS in all scenarios tested. Remarkably, AutoLFADS does this in a  
96 completely unsupervised manner that does not depend on the knowledge of the tasks, subjects’ behaviors, or brain  
97 areas. In all applications, the method is applied “out of the box” without careful adjustment for each dataset. We believe  
98 these capabilities greatly extend the range of neuroscientific applications for which accurate inference of single-trial  
99 population dynamics should be achievable, and substantially lower the barrier to entry for applying these methods.  
100 Finally, we present a cloud software package and comprehensive tutorials to enable new users without machine learning  
101 expertise or dedicated computing resources to apply AutoLFADS successfully.

102  
103

## 104 Results

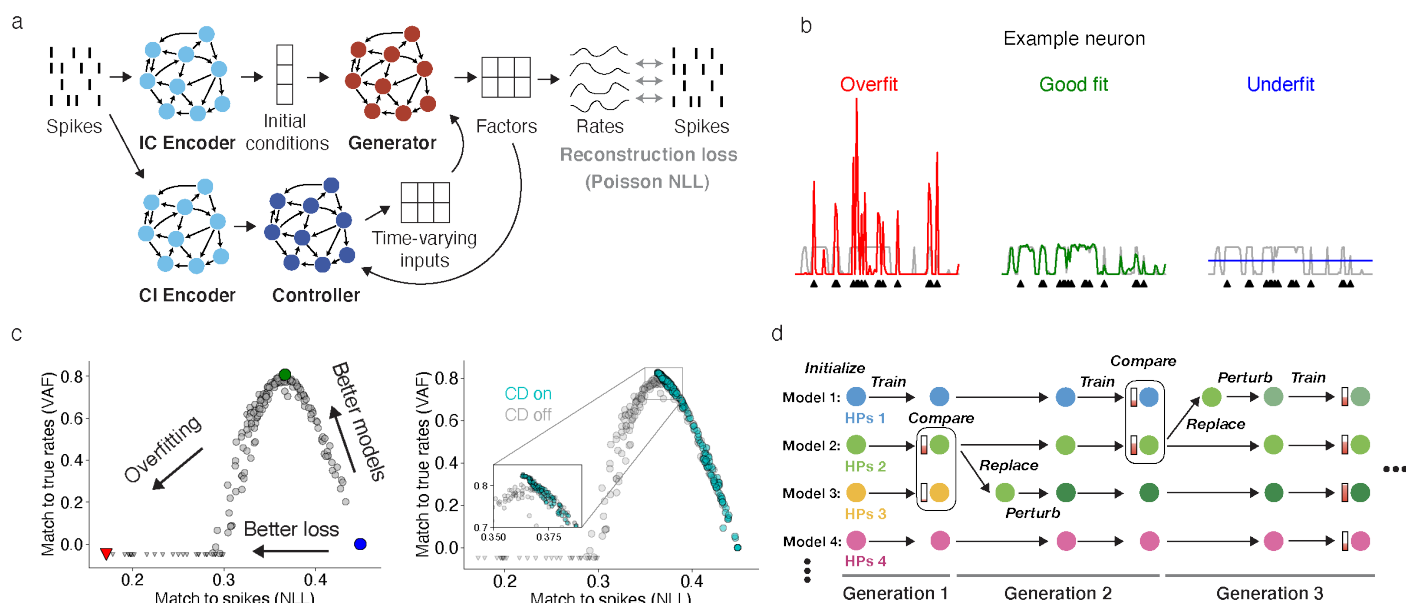

**Fig1 | AutoLFADS combines a novel neural network regularization method with a large-scale framework for automated hyperparameter optimization.** (a) Schematic of the LFADS architecture, showing how the generative model infers the firing rates that underlie the observed spikes. (b) Examples of LFADS-inferred rates (colored) and the corresponding synthetic input data (spikes, shown as black triangles) and data-generating distribution (ground truth rates, shown as gray traces) for three fitting modes. (c) Left: performance of 200 LFADS models with random HPs in matching the spikes and the known rates of a synthetic dataset, measured by negative log-likelihood (NLL) and variance accounted for (VAF) respectively. Colored points indicate the models that produced the rates in the previous panel. Right: same as previous, but for models trained with CD. (d) Schematic of the PBT approach to HP optimization. Each colored circle represents an LFADS model with a certain HP configuration and partially filled bars represent model performance. Models are trained for fixed intervals (generations), between which poorly-performing models are replaced by copies of better-performing models with perturbed HPs.

### 117 LFADS architecture

The LFADS architecture (Fig. 1a) has been detailed previously (20,22,26). Briefly, LFADS is based on the idea that the evolution of a neural population's activity in time can be modeled as a non-autonomous dynamical system, i.e., a dynamical system whose state evolution is influenced by both internal dynamics and external inputs. This dynamical system is approximated by a recurrent neural network (RNN) known as the generator. Observed spiking activity from each neuron is assumed to reflect an underlying firing rate that is linked to the state of the generator at each timestep. Separately, to enable modeling of input-driven dynamical systems, time-varying inputs are inferred by a controller RNN, which receives as input an encoding of the spike count data as well as the generator's output at the previous time step. This architecture is a modification of a sequential variational autoencoder (VAE) (22,27,28). When training the model, the objective is to maximize a lower bound on the Poisson likelihood of the observed spiking activity given the inferred rates (see *Methods* for details).

It is imperative to regularize the model properly in order to extract useful spike rates (Fig. 1b) (26). This can be achieved through HP optimization. The two main classes of LFADS HPs are those that set the network architecture (e.g., number of units in each RNN, dimensionality of initial conditions, inputs, and factors), and those that control regularization and training (e.g., L2 penalties, scaling factors for KL penalties, dropout probability, and learning rate; described in *Methods*). The optimal values of these HPs could depend on various factors such as dataset size, dynamical structure underlying the activity of the brain region being modeled, and the behavioral task.

A critical challenge for autoencoders is that automatic HP searches face a type of overfitting that is particularly hard to address (26). Given enough capacity, the model can find a trivial solution where it simply passes individual spikes from the input to the output firing rates, akin to an identity transformation of the input without modeling any meaningful structure underlying the data (Fig. 1b). Importantly, such pathological overfitting is not detectable by standard validation likelihood,

140 as the failure mode also results in high likelihood and poor modeling of validation data. We performed a 200-model  
141 random search over a space of KL, L2, and dropout regularization HPs that was empirically determined to yield both  
142 underfitting and overfitting models on a synthetic dataset (see *Methods* for a description of the dataset). Models that  
143 appear to have the best likelihoods actually exhibit poor inference of underlying firing rates, indicating a type of  
144 pathological overfitting (**Fig. 1c**, left). This phenomenon is also consistently observed on real data throughout this paper:  
145 better validation loss did not indicate better performance for any of our decoding or PSTH-based metrics.

146  
147 The lack of a reliable validation metric has prevented automated HP searches because it is unclear how one should  
148 select between models when underlying firing rates are unavailable or non-existent. To address this issue, we developed  
149 a novel regularization technique called coordinated dropout (CD) that forces the network to model only structure that is  
150 shared across neurons (26). After applying CD, we repeated the previous test on synthetic data using 200 LFADS models  
151 from the same HP search space, and found that they no longer overfit spikes (**Fig. 1c**, right). CD restored the  
152 correspondence between model quality assessed from matching spikes (validation likelihood) and matching rates,  
153 allowing the former to be used as a surrogate when the latter is not available.

154  
155 The premise of this paper is that this reliable validation metric should enable large-scale HP searches and fully-  
156 automated selection of high-performing neuroscientific models despite having no access to ground truth firing rates. To  
157 test this, we needed an efficient HP search strategy. We chose a recent method based on parallel search called  
158 Population Based Training (PBT; **Fig. 1d**) (25,29). PBT distributes training across dozens of models simultaneously, and  
159 uses evolutionary algorithms to tune HPs over many generations. Because PBT distributes model training over many  
160 workers, it matches the scalability of parallel search methods such as random or grid search, while achieving higher  
161 performance with the same amount of computational resources (25,29).

162  
163 These two key modifications - a novel regularization strategy (CD) that results in a reliable validation metric, and an  
164 efficient approach to HP optimization (PBT) - yield a large-scale, automated framework for model tuning, which we refer  
165 to as AutoLFADS. In the following sections, we test the performance of AutoLFADS on previously characterized datasets,  
166 as well as novel ones. We start by evaluating AutoLFADS using data from M1/PMd in a structured reaching task to  
167 investigate the model's performance on a well-characterized dataset that had been previously used to benchmark the  
168 performance of LFADS (20,26). On this data, we demonstrate that proper HP tuning leads to models that consistently  
169 outperform LFADS and that this gap grows substantially when data are limited. Next, we move to assessing the ability  
170 of AutoLFADS to approximate input-driven dynamics, using data from M1 in a random target task, data from area 2 in a  
171 reaching task with mechanical perturbations, and data from DMFC in a cognitive timing task. In each case, by several  
172 metrics, AutoLFADS consistently achieves better results than random searches that used three times the computational  
173 resources, despite performing model selection in a completely unsupervised fashion.

174

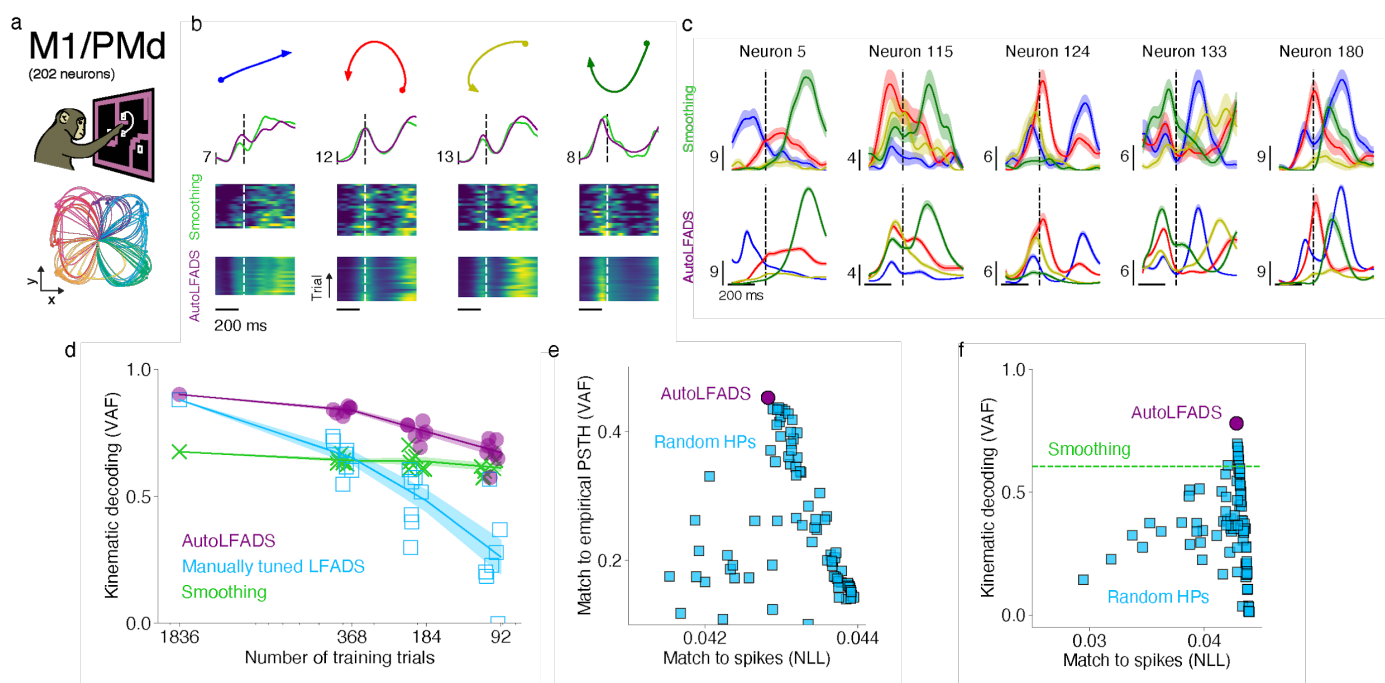

**Fig2 | Application of AutoLFADS to data from motor cortex.** (a) Schematic of the maze task (top), and representative reach trajectories across 108 total conditions, colored by target location (bottom). (b) Average reach trajectories (top), PSTHs (second row) and single-trial firing rates (bottom) obtained by smoothing (Gaussian kernel, 30 ms s.d.) or AutoLFADS for a single neuron across 4 reach conditions. All data is modeled at 2 ms bins. Dashed lines indicate movement onset and vertical scale bars denote rates (spikes/s). (c) PSTHs produced by smoothing spikes (top) or by applying AutoLFADS (bottom), for 5 example neurons. Shaded regions are standard errors. Movement onset and rate scales are denoted as in the previous panel. (d) Performance in decoding reaching kinematics (arm velocities) as a function of training dataset size. Trial counts exclude the 20% of trials for each dataset size that were held-out for model evaluation. We decoded X and Y arm velocities from smoothed spikes, rates inferred by LFADS with manually-tuned hyperparameters (HPs), and rates inferred by AutoLFADS. Accuracy was quantified by VAF. Lines and shading denote mean  $\pm$  standard error across 7 models trained on randomly-drawn subsets of the full dataset. (e) Performance in replicating the empirical PSTHs computed on all trials using rates inferred from a 184-trial training set using AutoLFADS and LFADS with random HPs (100 models). (f) Hand velocity decoding performance for firing rates from a 184-trial training set (same models as in (e)).

### AutoLFADS outperforms original LFADS when applied on benchmark data from M1/PMd

We first evaluated AutoLFADS on data from motor cortex during a highly stereotyped behavior, which was used to assess the original LFADS method (20). We used 202 neurons simultaneously recorded from M1 and PMd during a maze reaching task (see *Methods*) in which a monkey made a variety of straight and curved reaches after a delay period following target presentation (**Fig. 2a**; dataset consisted of 2296 individual reach trials spanning 108 reach types). Previous analyses of the delayed reaching paradigm demonstrated that activity during the movement period is well modeled as an autonomous dynamical system (10,20). In this abstract model, the temporal evolution of the neural population's activity is predictable based on the state it reaches during the delay period. Therefore, previous work modeled these data with a simplified LFADS configuration which could only approximate autonomous dynamics (20). However, this simplified model is not applicable more broadly to situations in which both autonomous dynamics and external inputs might be needed to describe neural activity. Therefore, in this paper we do not constrain the network architecture to only model autonomous dynamics for any applications tested, to determine whether AutoLFADS can automatically adjust the degree to which autonomous dynamics and inputs are needed to model the data.

AutoLFADS operates on unlabeled segments of binned spiking data and infers firing rates for each neuron in an unsupervised manner. Consistent with previous applications of LFADS on this dataset (20,26), the firing rates inferred by AutoLFADS for 2 ms bins exhibited clear and consistent structure on individual trials (**Fig. 2b**, bottom). We also verified that these firing rates captured features of the neural responses revealed by averaging across trials, a common method of de-noising neural activity (**Fig. 2b**, second row, and **Fig. 2c**).

209 A generalizable method should be able to perform well across the broad range of dataset sizes typical of neuroscience  
210 experiments. To test this, we compared AutoLFADS and manually-tuned LFADS models that were trained using either  
211 the full dataset (2296 trials), or randomly sampled subsets containing 5, 10, and 20% of the trials. We first tested the  
212 degree to which the representations produced by the models were informative about observable behavior, which we  
213 quantified by decoding the monkey's hand velocity from the inferred rates using optimal linear estimation (**Fig 2d**). At  
214 the largest dataset size, decoding performance for AutoLFADS and manually-tuned LFADS was comparable. This result  
215 fits with standard intuition that performance is less sensitive to HPs when sufficient data are available. However, for all  
216 three reduced dataset sizes, the AutoLFADS outperformed the manually-tuned model ( $p < 0.05$  for all three sizes, paired,  
217 one-tailed Student's t-test).

218  
219 While this result is promising, the difference in robustness to dataset size between AutoLFADS and LFADS could have  
220 resulted from a particularly poor selection of HPs during manual tuning. To control for this possibility, we chose one of  
221 the smaller data subsets (184 trials) and trained 100 additional LFADS models with randomly-selected HPs. We  
222 evaluated the models' performance in two ways: how accurately the models replicated the empirical trial-averaged firing  
223 rates (PSTHs; **Fig. 2e**), and how accurately arm velocity could be decoded from inferred rates (**Fig. 2f**). While the LFADS  
224 models achieved a broad range of performance, models with better validation likelihoods did not achieve better inference  
225 of firing rates, mirroring our earlier findings with synthetic data (**Fig. 1c**). Thus it is unclear how one could select amongst  
226 the LFADS models with random HPs without some supervised intervention. In contrast, the single AutoLFADS model,  
227 chosen in a completely unsupervised fashion, outperformed all LFADS models for both performance metrics.

228  
229 Taken together, these results show that even if one performed a random search and then selected a model using a  
230 supervised approach (e.g., based on reconstruction of empirical PSTHs or decoding accuracy), its performance would  
231 still be substantially lower than that of AutoLFADS. Additionally, this validation - i.e., that the unsupervised approach  
232 produces high-performing models - provides evidence that even in cases where such supervision is unavailable (e.g.,  
233 settings that lack clear task structure or measurement of behavioral variables), AutoLFADS models will still be high  
234 performing.

### 235 **AutoLFADS uncovers population dynamics without structured trials**

236 To-date, most efforts to tie dynamics to neural computations have used experiments where subjects perform constrained  
237 tasks with repeated, highly structured trials. For example, motor cortical dynamics are often framed as a computational  
238 engine to link the processes of motor preparation and execution (6–8). To interrogate these dynamics, most studies use  
239 a delayed-reaching paradigm that creates explicit pre-movement and movement periods. However, constrained  
240 behaviors may have multiple drawbacks in studying dynamics. First, it is unclear whether such artificial paradigms are  
241 good proxies for everyday behaviors. Second, highly constrained, repeated behaviors might impose artificial limits on  
242 the properties of the uncovered dynamics, such as the measured dimensionality of the neural population activity (30).  
243 Even outside of movement neuroscience, the requirement that we conduct many repetitions of constrained tasks  
244 significantly hinders our ability to study a rich sample of the dynamics of a given neural population. Accurate inference  
245 of neural dynamics without these constraints could facilitate dynamics-based analyses of richer datasets that are more  
246 reflective of the brain's natural behavior.  
247

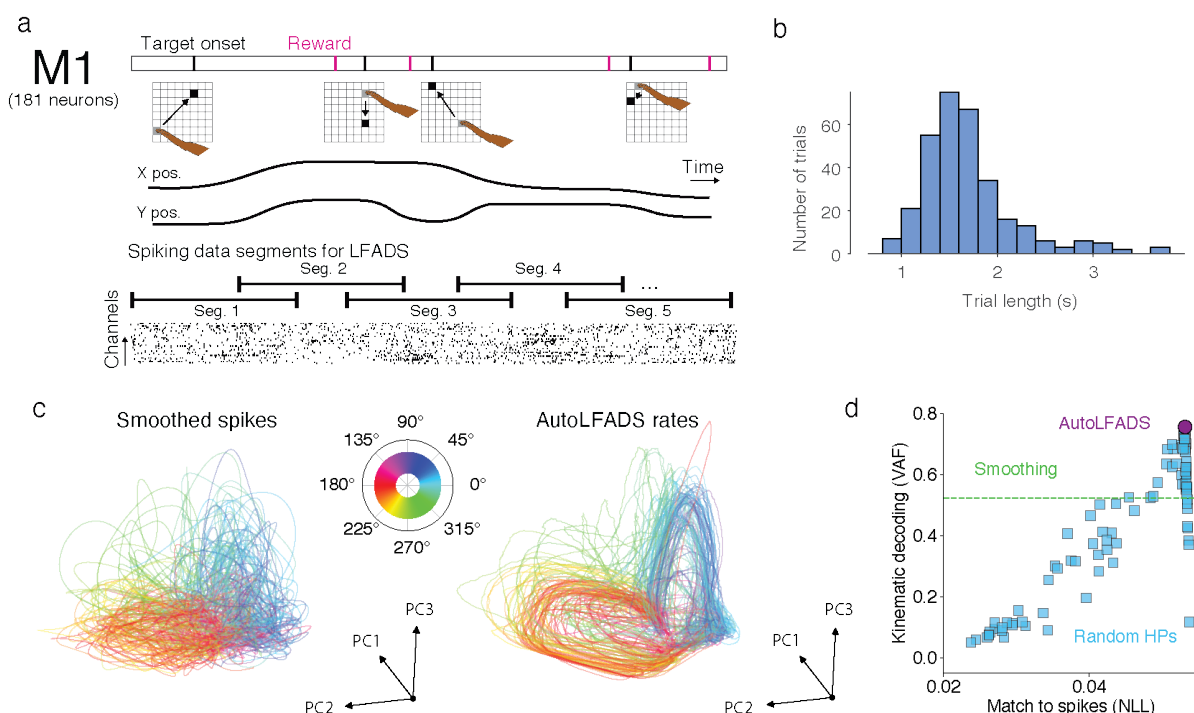

248  
249  
250  
251  
252  
253  
254  
255  
256  
257

**Fig3 | Modeling neural activity in M1 without knowledge of trial or task information.** (a) Top: Schematic of the random target task, which lacks stereotyped trial structure and delay periods. Bottom: Continuous neural activity (spiking data) recorded during back-to-back reaching trials was divided into 600 ms segments with 200 ms of overlap between adjacent segments. After modeling by AutoLFADS, the inferred firing rates from different segments were merged together to create a continuous segment, using a weighted average of data at overlapping timepoints. (b) Distributions of trial lengths (time between onsets of successive targets) for 313 total trials. (c) Subspaces of neural activity extracted using PCA and colored by angle to the target. Left: 3D subspace that captures the most variance in smoothed spiking activity. Center: Subspace that captures the most variance in AutoLFADS rates. (d) Accuracy in decoding hand velocity from firing rates inferred by smoothing, 100 LFADS models with random HPs, and AutoLFADS.

258 In order to provide access to a much broader range of experimental data, we tested whether AutoLFADS could model  
259 data without regard to trial structure. We applied AutoLFADS to neural activity from a monkey performing a continuous,  
260 self-paced random target reaching task (Fig. 3a, top) (31), in which each movement started and ended at a random  
261 position, and movements were highly variable in duration (Fig. 3b). Analysis of data without consistent temporal structure  
262 repeated across trials is challenging, as trial-averaging is not feasible. Even the available single-trial analytical methods  
263 have typically relied on strong simplifying assumptions that are not applicable to less-structured tasks. For example,  
264 previous efforts to uncover motor cortical dynamics during single reaches have been able to consider only brief data  
265 segments that begin with the arm at a consistent starting point, and relied on behavioral events such as target or  
266 movement onset to align trials before analysis (17,20,26,32–36).  
267

268 Like most machine learning algorithms, AutoLFADS operates on discrete, fixed-length segments of neural data. To  
269 create these segments from a task with highly variable timing, we chopped an approximately 9 minute window of  
270 continuous neural data into 600 ms segments with 200 ms of overlap (Fig. 3a, bottom) without regard to trial boundaries.  
271 After modeling with AutoLFADS, we merged inferred firing rates from individual segments, which yielded inferred rates  
272 for the original continuous window. We then analyzed the inferred rates by aligning the data to movement onset for each  
273 trial (see Methods). Even though the dataset was modeled without the use of trial information, inferred firing rates during  
274 the reconstructed trials exhibited consistent progression in an underlying state space, with clear structure that  
275 corresponded with the monkey's reach direction on each trial (Fig. 3c, right). Further, the inferred firing rates were highly  
276 informative about moment-by-moment details of the measured reaching movements: AutoLFADS enabled decoding of  
277 continuous hand velocities with substantially higher accuracy than did smoothing ( $R^2$  of 0.76 for AutoLFADS v. 0.52 for  
278 smoothing), and it also outperformed all LFADS models with random HPs (Fig. 3d).

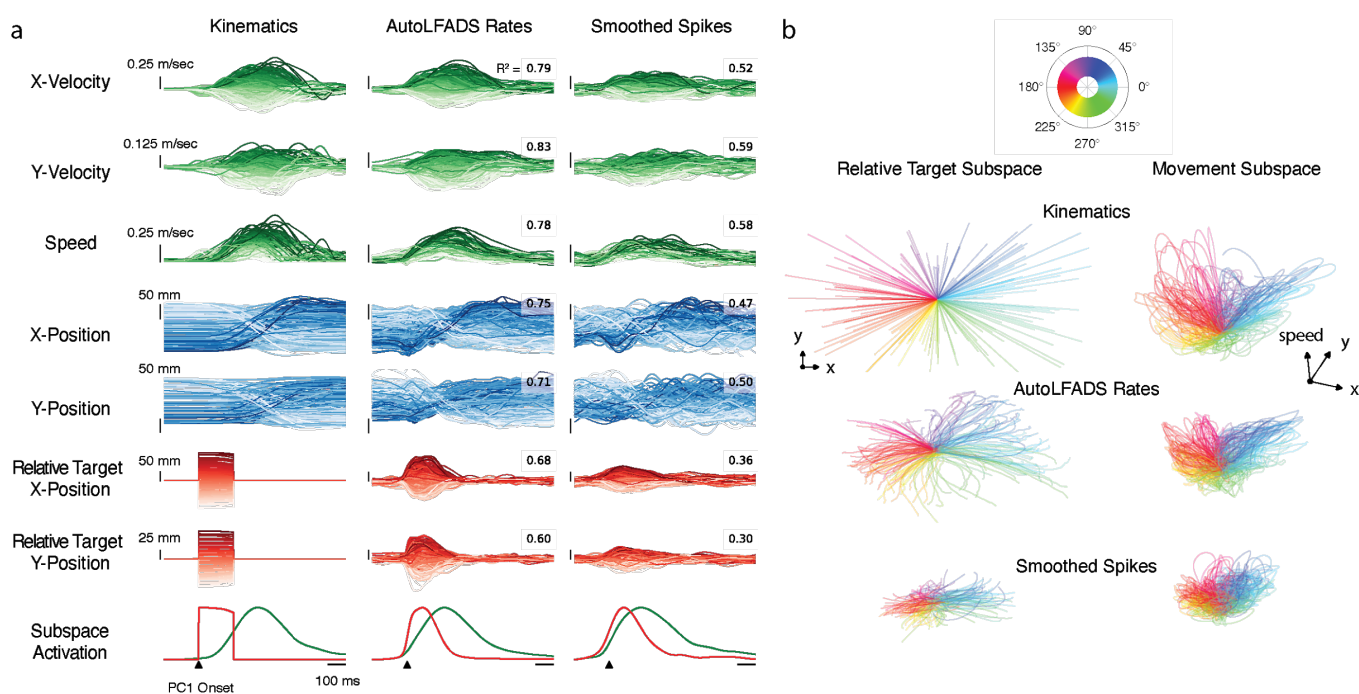

279  
280  
281  
282  
283  
284  
285  
286

**Fig4 | Inferred firing rates contain neural subspaces that are informative about movement kinematics and reach targets.** (a) Kinematic and relative target variables and their corresponding neural representations, uncovered via linear regression. The quality of each projection is quantified by accuracy in decoding kinematic and target variables ( $R^2$ ). Plots are colored by x and y distance to target, except for speed which is colored by peak speed. Bottom row represents the normalized activation of movement (green) and relative target (red) subspaces, illustrating the more transient activation in the target subspace. (b) Movement and relative target subspaces plotted as 3D trajectories and colored by angle to target.

287  
288  
289  
290  
291  
292  
293  
294  
295  
296  
297  
298  
299

In support of the hypothesis that AutoLFADS is picking up on meaningful dynamics that occurred throughout the session, we found that the firing rates inferred by AutoLFADS were informative of the previously-hypothesized computational role of motor cortical dynamics - i.e., linking the process of movement preparation and execution - despite the model being trained without information about the monkey's behavior (**Fig. 4**). In particular, firing rates contained subspaces that were highly informative about hand position, hand velocity, and reach target on individual trials (**Fig. 4a**) and showed clear structure relative to the task (**Fig. 4b**). To find the subspaces, we used linear regression to project neural activity onto variables related to movement goals (reach target) and movement details (position, velocity and speed). Notably, the subspace reflecting reach target was transiently active around the time of movement execution, consistent with previous studies that have demonstrated the presence of preparatory activity in motor cortex, yet revealed without an explicit preparatory period. It is likely that the rates inferred by AutoLFADS also contain yet undiscovered subspaces and representations that can be explored in this same dataset without experiments explicitly designed to reveal them. Thus, AutoLFADS has the potential to greatly improve the utility and versatility of rich behavioral datasets via a unique unsupervised modeling process.



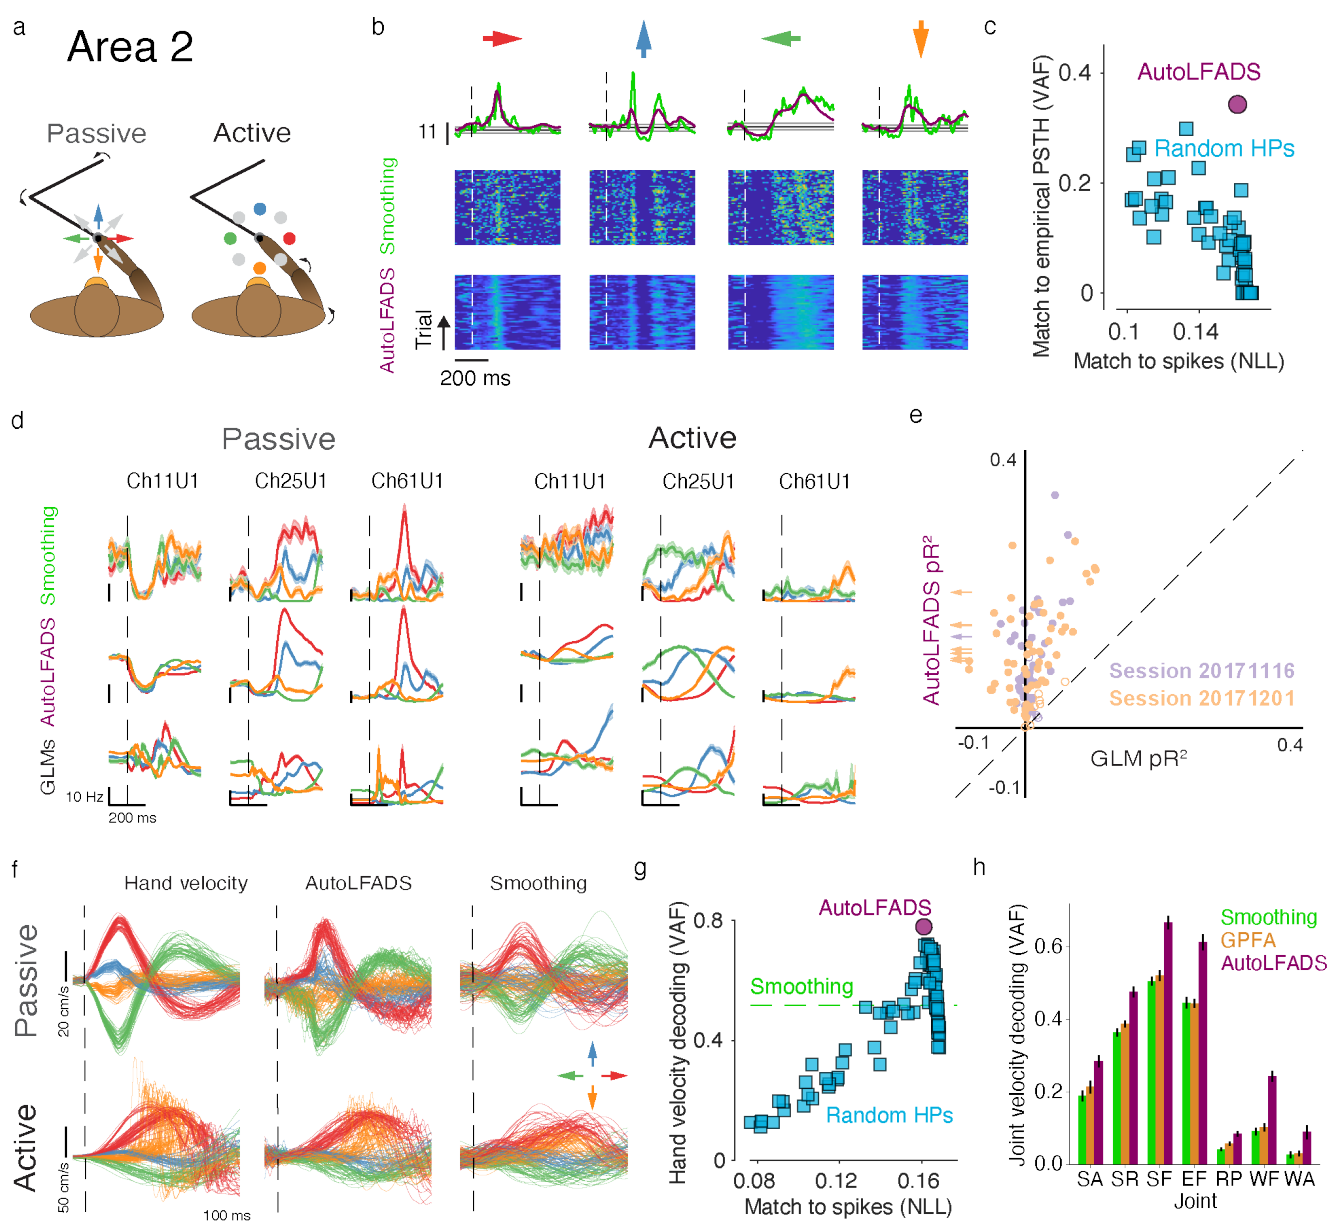

300  
301  
302  
303  
304  
305  
306  
307  
308  
309  
310  
311  
312  
313  
314

**Fig5 | Application of AutoLFADS to data from somatosensory cortex area 2.** (a) Schematic of the center-out, bump task showing passive and active conditions. (b) PSTHs and single-trial firing rates for a single neuron across 4 passive perturbation directions. Smoothing was performed using a Gaussian kernel with 10 ms s.d.. Dashed lines indicate movement onset. (c) Comparison of AutoLFADS vs. random search in matching empirical PSTHs. (d) PSTHs produced by smoothing spikes (top), AutoLFADS (middle), or GLM predictions (bottom) for 3 example neurons. (e) Comparison of spike count predictive performance for AutoLFADS and GLMs. Filled circles correspond to neurons for which AutoLFADS  $pR^2$  was significantly higher than GLM  $pR^2$ , and open circles correspond to neurons for which there was no significant difference. Arrows (left) indicate neurons for which GLM  $pR^2$  was outside of the plot bounds. (f) Subspace representations of hand x-velocity during active and passive movements extracted from smoothed spikes and rates inferred by AutoLFADS. (g) Comparison of AutoLFADS vs. random search in decoding hand velocity during active trials. (h) Joint angular velocity decoding performance from firing rates inferred using smoothing, Gaussian process factor analysis (GPFA), and AutoLFADS. Error bars denote standard error of the mean. Joint abbreviations: shoulder adduction (SA), shoulder rotation (SR), shoulder flexion (SF), elbow flexion (EF), wrist radial pronation (RP), wrist flexion (WF), and wrist adduction (WA).

### 315 **AutoLFADS accurately captures single-trial population dynamics in somatosensory cortex**

316 Results from the motor cortical datasets demonstrated that AutoLFADS could produce accurate dynamical models that  
317 were robust to training dataset size and generalized well across task conditions, without requiring highly constrained  
318 tasks or repeated trials. We next investigated whether AutoLFADS, without manual adjustment, could accurately model  
319 dynamics associated with sensory processes. Specifically, we modeled activity in somatosensory area 2 during a  
320 reaching task with mechanical perturbation.

321  
322 Area 2 provides a valuable test case for AutoLFADS generalization. As a sensory area, area 2 receives strong afferent  
323 input from cutaneous receptors and muscles and is robustly driven by mechanical perturbations to the arm (37–39).  
324 Functionally, area 2 is thought to serve a role in mediating reach-related proprioception (38–41), was recently shown to  
325 contain information about whole-arm kinematics (39), and may also receive efferent input from motor areas  
326 (38,39,42,43).

327  
328 In the area 2 experiment (**Fig. 5a**), a monkey used a manipulandum to control a cursor. The task began with a center-  
329 hold period where the monkey held the cursor in the center of the screen. During half of the center-hold attempts, the  
330 manipulandum randomly perturbed the monkey's arm in one of the eight directions, and the monkey had to re-acquire  
331 the central target (passive movement trials). Following the center-hold, the monkey moved to acquire one of eight  
332 peripheral targets (active movement trials). The single-trial rates inferred by AutoLFADS for passive trials exhibited clear  
333 and structured responses to the unpredictable perturbations (**Fig. 5b**), highlighting the model's ability to approximate  
334 input-driven dynamics.

335  
336 As for M1/PMd, we verified that the rates inferred by AutoLFADS accurately reproduced empirical PSTHs and were  
337 informative of task variables. The inferred rates captured the distinct features of PSTHs during active and passive trials,  
338 even though no behavioral or task information was provided to the model (**Fig. 5b**; top, and **Fig. 5c**). The rates inferred  
339 by AutoLFADS also had a much closer correspondence to the empirical PSTHs during passive trials than LFADS models  
340 trained with random HPs (**Fig. 5c**). However, sensory brain regions like area 2 are typically characterized in terms of  
341 how neural activity encodes sensory stimuli (37–39). Thus, we examine whether rates inferred by AutoLFADS explain  
342 observed spikes better than a typical area 2 neural encoding model, in which neural activity is fit to some function of the  
343 state of the arm. We fit a generalized linear model (GLM) for each neuron over both active and passive movements,  
344 where the firing rate was solely a function of the position and velocity of the hand, as well as the contact forces with the  
345 manipulandum handle (39) (GLM predictions shown in **Fig. 5d**). We then compared the ability of the GLM and  
346 AutoLFADS to capture each neuron's observed response using pseudo- $R^2$  ( $pR^2$ ), a metric similar to  $R^2$  but adapted for  
347 the Poisson statistics of neural firing (44). For the vast majority of neurons across two datasets, AutoLFADS predicted  
348 the observed activity significantly better than GLMs ( $p < 0.05$  for 110/121 neurons, bootstrap; see *Methods*), and there  
349 were no neurons for which the GLM produced better predictions than AutoLFADS (**Fig. 5e**).

350  
351 We used linear decoding to extract subspaces of neural activity that corresponded to x and y hand velocities for both  
352 smoothed spikes and rates inferred by AutoLFADS (**Fig. 5f**). The AutoLFADS rates contained subspaces that more  
353 clearly separated hand velocities for all active conditions and all passive conditions than smoothing, showing that they  
354 are better represented in the modeled dynamics of area 2. Further, single-trial hand velocity decoding from rates inferred  
355 by AutoLFADS for active trials was substantially more accurate than that of smoothing, and also more accurate than  
356 decoding from the output of any random search model (**Fig. 5g**). On a second dataset that included whole-arm motion  
357 tracking, the velocity of all joint angles was decoded from AutoLFADS rates with higher accuracy than from smoothing  
358 or GPFA (**Fig. 5h**, right;  $p < 0.05$  for all joints, paired, one-sided Student's t-Test).

359

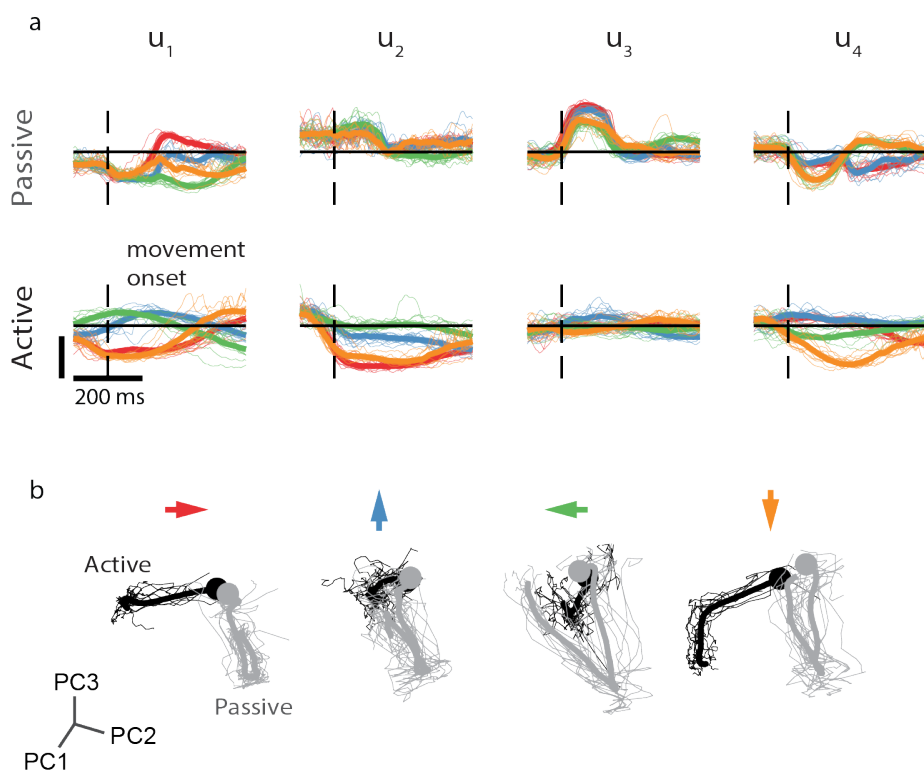

360

361 **Fig6 | AutoLFADS-inferred inputs for area 2 neural activity.** (a) Time-courses of the four inferred generator input dimensions for  
362 passive (top) and active (bottom) conditions. Thick line indicates average input trace for each direction, indicated by color, while thin  
363 colored lines show input traces for ten randomly chosen trials. Vertical scale bar is A.U. (b) Projection of four-dimensional inputs, from  
364 -100 ms to 200 ms around movement onset, into the top three principal components, with separate plots for each movement direction.  
365 Darker lines indicate active trials while lighter lines denote passive trials. Large dots indicate average initial input in PC space. Thick  
366 and thin lines follow conventions in (a).

367 Since area 2 plays a significant role in processing sensory inputs, it stands to reason that the inputs inferred by  
368 AutoLFADS are important for successfully modeling the area's activity as a dynamical system. If AutoLFADS is  
369 successfully modeling area 2 as an input-driven dynamical system, we should expect the inferred inputs to be consistent  
370 across trials with the same behavioral conditions. In these experiments, AutoLFADS models the data as fixed-length  
371 segments without regard to trial boundaries, so there is no guarantee of the consistency of the meaning of a given input  
372 between different trials of the same condition or even within a single trial.

373 Despite the unsupervised modeling process, AutoLFADS inferred input trajectories that were consistent with the  
374 supervised notions of trials, directions, and perturbation types (**Fig. 6a**). Inputs were continuous over the course of a  
375 trial, implying that the model was able to pick up on statistical similarities between adjacent segments. The model also  
376 produced similar input patterns within a given condition, showing that it was able to detect the statistical patterns of a  
377 given condition from arbitrary segments of time during arbitrary trials. Finally, AutoLFADS produced distinct and logically  
378 consistent output patterns for active and passive trials. Inputs for abrupt passive movements generally had a much  
379 shorter time course that unfolded post-perturbation, while inputs for active trials began before movement and evolved  
380 more slowly. Visualization of these inputs highlights AutoLFADS's ability to infer distinct inputs for distinct subsets of the  
381 data (**Fig. 6b**).

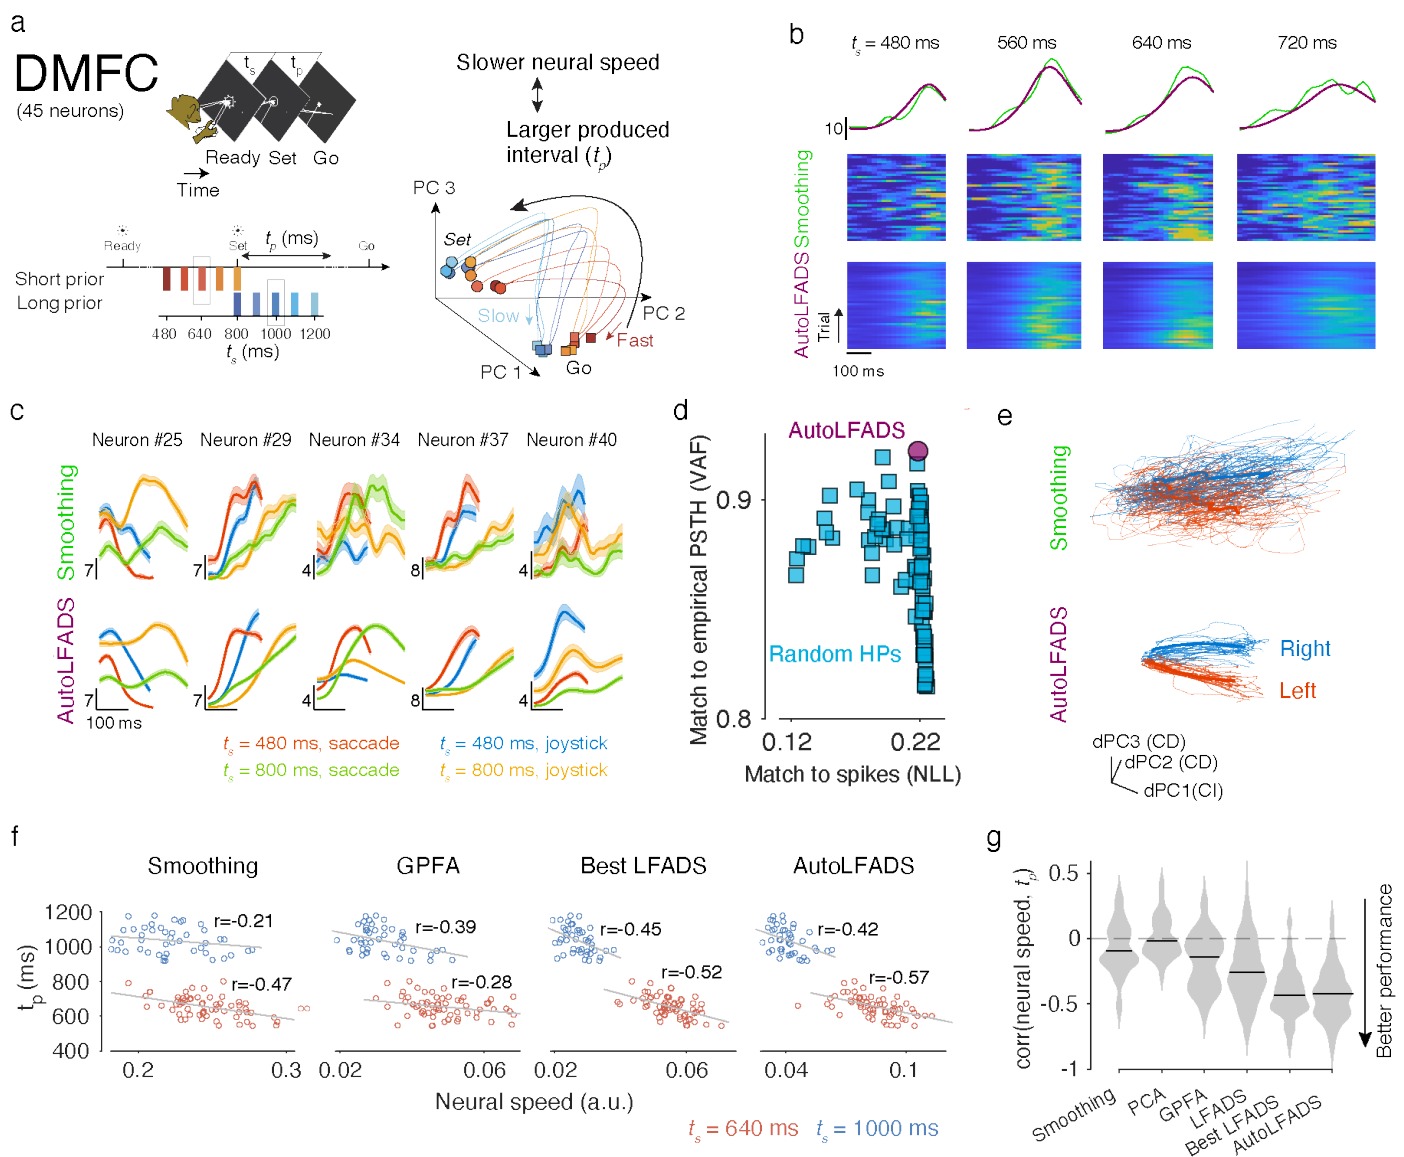

382

383

384

385

386

387

388

389

390

391

392

393

394

395

396

397

**Fig7 | Application of AutoLFADS to data from dorsomedial frontal cortex (DMFC).** (a) Top left: the time interval reproduction task. Bottom left: timing conditions used. Right: schematic illustrating the inverse correlation between neural speed and monkey's produced time ( $t_p$ ). (b) PSTHs and single-trial firing rates for an example neuron during the Set-Go period of leftward saccade trials across 4 different values of  $t_s$  (vertical scale bar: spikes/sec). Smoothing was performed using a Gaussian kernel with 25 ms s.d.. (c) PSTHs for 5 example neurons during the Set-Go period of rightward trials for two response modalities and two values of  $t_s$ . (d) Performance in replicating the empirical PSTHs. (e) Visualization of low-dimensional trial-averaged and single-trial neural trajectories for the Ready-Set period for left and right joystick trials with  $t_s$  of 1000 ms. 30 trials are shown for each condition. dPC: demixed principal component, CI: condition-independent, CD: condition-dependent. (f) Example plots showing correlations between neural speed and behavior (i.e., production time,  $t_p$ ) for individual trials across two timing intervals (red: 640 ms blue: 1000 ms). Neural speed was obtained based on the firing rates inferred from smoothing, GPFA, the LFADS model with best median speed- $t_p$  correlation across the 40 different task conditions (Best LFADS), and AutoLFADS. (g) Distributions of correlation coefficients across 40 different task conditions. Horizontal lines denote medians. For LFADS, the distribution includes correlation values for all 96 models with random HPs (40x96 values).

## 398 **AutoLFADS accurately captures single-trial dynamics during cognition**

399 While activity in M1 and area 2 are largely driven by internal dynamics and inputs, respectively, many brain areas depend  
400 critically on the confluence of internal dynamics and inputs. To further test the generality of AutoLFADS to these  
401 situations, we applied it to data collected from dorsomedial frontal cortex (DMFC) during a cognitive time estimation task.  
402 DMFC comprises the supplementary eye field, dorsal supplementary motor area, and presupplementary motor area. It  
403 is often considered an intermediate region in the sensorimotor hierarchy (45), interfacing with both low-level sensory and  
404 motor (PMd/M1) areas. DMFC activity is less closely tied to the moment-by-moment details of movements than activity  
405 in M1 or area 2 - instead, its activity seems to relate to higher-level aspects of motor control, including motor timing  
406 (46,47), planning movement sequences (48), learning sensorimotor associations (49) and context-dependent reward  
407 modulation (50). However, population dynamics in DMFC are tied to behavioral correlates such as movement production  
408 time (15,47,51). This makes DMFC another excellent test case for unsupervised modeling with AutoLFADS.

409  
410 For this task, the monkey was presented with two visual stimuli (“Ready” and “Set”, respectively), separated by sample  
411 timing interval  $t_s$ . After “Set”, the monkey attempted to reproduce the interval by waiting for the same amount of time ( $t_p$ )  
412 before initiating a movement (“Go”) (**Fig. 7a**, left). The movement was either a saccade or joystick manipulation to the  
413 left or right depending on the location of a peripheral target. The two response modalities, combined with 10 timing  
414 conditions ( $t_s$ ) and two target locations, led to a total of 40 task conditions.

415  
416 Consistent with our observations on M1/PMd and area 2 data, AutoLFADS-inferred rates for this dataset showed  
417 consistent, denoised structure at the single-trial level (**Fig. 7b**, bottom) and recapitulated the features of neural responses  
418 uncovered by trial averaging (**Fig. 7b**, top; **Fig. 7c**). Quantitative comparison of the PSTHs shows that AutoLFADS-  
419 inferred rates again achieved a better match to the empirical PSTHs than all of the random search models (**Fig. 7d**),  
420 providing further evidence that AutoLFADS can achieve superior models without expert tuning of regularization HPs or  
421 supervised model selection criteria. Additionally, when visualized in a low-dimensional space using demixed principal  
422 components analysis (dPCA), the AutoLFADS-inferred firing rates showed much greater consistency across trials of a  
423 given condition than firing rates computed by smoothing spikes (**Fig. 7e**).

424  
425 To evaluate the AutoLFADS model beyond its ability to capture trial-averaged responses, we sought to evaluate whether  
426 its predicted firing rates were more informative of trial-by-trial timing behaviors than other methods. Previous studies  
427 have shown that the monkey's produced time interval ( $t_p$ ) is negatively correlated to the speed at which the neural  
428 trajectories evolve during the Set-Go period (**Fig. 7a**, right) (15,51). To evaluate the correspondence between neural  
429 activity and behavior, we estimated neural speeds using representations produced by smoothing spikes, GPFA, principal  
430 component analysis (PCA), the best random search model (‘Best LFADS’, see *Methods* for details), and an AutoLFADS  
431 model, and measured the trial-by-trial correlation between the estimated speeds and  $t_p$ . Note that selecting the best  
432 random search model again required a supervised calculation ( $t_p$  correlation) for each model. If a given representation  
433 of neural activity is more informative about behavior, we expect a stronger (more negative) correlation between predicted  
434 and observed  $t_p$ .

435  
436 We show correlation values for individual trials across two different values of  $t_s$  (**Fig. 7f**), and summarize across all 40  
437 task conditions (**Fig. 7g**). We observed consistent negative correlations between  $t_p$  and the estimated neural speed from  
438 rates obtained by different methods. Correlations from rates inferred by AutoLFADS were significantly better than all  
439 unsupervised approaches ( $p < 0.001$ , Wilcoxon signed rank test), and comparable with the supervised selection approach  
440 (‘Best LFADS’,  $p = 0.758$ , Wilcoxon signed rank test), despite using no task information.

441  
442 Taken together, the area 2 and DMFC results demonstrate that the out-of-the-box, automated inference of neural  
443 population dynamics provided by AutoLFADS allows modeling of diverse brain areas, with dynamics that span the  
444 continuum from autonomous to input-driven. AutoLFADS provides a powerful framework for generalized inference of  
445 input-driven dynamics and enables decoding of simultaneously monitored behavioral variables with unprecedented  
446 accuracy. Importantly, the unsupervised approach of AutoLFADS avoids the use of any behavioral data and optimizes  
447 only for neural modeling. This allows for modeling when behavioral data is not available and also prevents any behavioral  
448 biases from being introduced to the firing rates, resulting in better inference of the brain's inherently generalized

449 representations. This is evident in the high performance of AutoLFADS rates in both PSTH reconstruction and various  
450 decoding tasks.

451

### 452 **Running AutoLFADS in the Cloud**

453 A key challenge with emerging, computationally-intensive data analysis methods is that the computational infrastructure  
454 and expertise necessary to make effective use of these tools is a significant barrier to widespread adoption (52). For  
455 example, many labs do not have the resources necessary to train dozens of models in parallel across many GPUs. To  
456 address this hurdle, we provide an open-source implementation of AutoLFADS designed to operate on Google Cloud  
457 Platform (GCP). Additionally, we provide a comprehensive tutorial to help novice users get started running AutoLFADS  
458 on GCP without expert knowledge of cloud computing or machine learning. The tutorial describes how to set up the  
459 framework, prepare input data, set up AutoLFADS runs, and load the final results. Users of AutoLFADS on GCP don't  
460 need to worry about the upfront hardware and labor costs associated with maintaining a local computing cluster, yet  
461 have access to virtually unlimited computation on demand. This framework allows researchers to spend less time doing  
462 non-research tasks like dependency management and hyperparameter optimization, while giving them confidence that  
463 their models are performing well, regardless of brain area or task. We include links to the code and tutorial in *Code*  
464 *Availability*.

465

### 466 **Discussion**

467 The original LFADS work (20) provided a method for inferring latent dynamics, denoised firing rates, and external inputs  
468 from large populations of neurons, producing representations that were more informative of behavior than previous  
469 approaches (33). However, application of LFADS to neural populations with different dynamics, strong external inputs,  
470 or unconstrained behavior would have necessitated time-consuming and subjective manual tuning. In the current work,  
471 we show that with robust regularization and efficient hyperparameter tuning it is possible to train high-performing LFADS  
472 models for neural spiking datasets with arbitrary size, trial structure, and dynamical complexity. We demonstrated several  
473 properties of the AutoLFADS training approach which have broad implications. On the maze task, we showed that  
474 AutoLFADS models are more robust to dataset size, opening up new lines of inquiry on smaller datasets and reducing  
475 the number of trials that must be conducted in future experiments. Using the random target task, we demonstrated how  
476 AutoLFADS needs no task information in order to generate rich dynamical models of neural activity. This enables the  
477 study of dynamics during richer tasks and reuse of datasets collected for another purpose. With the perturbed reaching  
478 task, we demonstrated the first application of dynamical modeling, as opposed to encoder-based modeling, to the highly  
479 input-driven somatosensory area 2. Finally, in the timing task, we showed that AutoLFADS found the appropriate balance  
480 between inputs and internal dynamics for a cognitive area by modeling DMFC.

481

482 AutoLFADS inherits some of the flaws of the LFADS model. For example, the linear-exponential-Poisson observation  
483 model is likely an oversimplification. However, we used this architecture as a starting point to show that a large-scale  
484 hyperparameter search is feasible and beneficial. By enabling large-scale searches, we can be reasonably confident  
485 that any performance differences achieved by future architecture changes will be due to real differences in modeling  
486 capabilities rather than a simple lack of HP optimization.

487

488 AutoLFADS performed well using a simple binary tournament exploitation and perturbation exploration strategies for  
489 PBT (25). Future work might investigate alternate exploitation or exploration strategies, or whether more powerful and  
490 efficient PBT variants (53) can increase speed and performance of AutoLFADS while lowering computational cost. A  
491 current limitation of AutoLFADS is its inability to explore hyperparameters that modify the underlying model architecture.  
492 Thus, another avenue for further work lies in combining AutoLFADS with the recent techniques for automated neural  
493 architecture search (54).

494

495 Though AutoLFADS is much more efficient than previous approaches, it still requires substantial computational  
496 resources that may not be available for all potential users. Setting up the requisite software environments can be an  
497 additional hurdle. Our GCP implementation allows users to apply AutoLFADS without needing to purchase and maintain  
498 a local cluster. We estimate that the compute cost for a typical AutoLFADS run on GCP is between \$5-25, depending  
499 on dataset and model sizes. We have created detailed tutorials to guide novice users through the setup, model training,  
500 and data retrieval processes, making AutoLFADS accessible to anyone who works with neural spiking data.

501

502

503 Taken together, AutoLFADS provides an accessible and extensible framework for generalized inference of single-trial  
504 neural dynamics that has the potential to unify the way we study computation through dynamics across brain areas and  
505 tasks.

506

### 507 **Code Availability**

508 AutoLFADS for GCP can be downloaded from GitHub at [github.com/snel-repo/autolfads](https://github.com/snel-repo/autolfads) and the tutorial is  
509 available at [snel-repo.github.io/autolfads](https://snel-repo.github.io/autolfads).

510

### 511 **Data Availability**

512 Data will be made available upon reasonable request from the authors. The random target dataset is publicly available  
513 at <http://doi.org/10.5281/zenodo.3854034>.

514

### 515 **Acknowledgements**

516 We thank K. Shenoy, M. Churchland, M. Kaufman, and S. Ryu for sharing the Monkey J Maze dataset. We also thank  
517 J. O'Doherty, M. Cardoso, J. Makin, and P. Sabes for making the random target dataset publicly available. This work  
518 was supported by the Emory Neuromodulation and Technology Innovation Center (ENTICE), NSF NCS 1835364,  
519 DARPA PA-18-02-04-INIT-FP-021, NIH Eunice Kennedy Shriver NICHD K12HD073945, the Alfred P. Sloan Foundation,  
520 the Burroughs Wellcome Fund, and the Simons Foundation as part of the Simons-Emory International Consortium on  
521 Motor Control (CP), NIH NINDS R01 NS053603, R01 NS095251, and NSF NCS 1835345 (LEM), NSF Graduate  
522 Research Fellowships DGE-1650044 (ARS) and DGE-1324585 (RHC), the Center for Sensorimotor Neural Engineering  
523 and NARSAD Young Investigator grant from the Brain & Behavior Research Foundation (HS), NIH NINDS NS078127,  
524 the Sloan Foundation, the Klingenstein Foundation, the Simons Foundation, the McKnight Foundation, the Center for  
525 Sensorimotor Neural Engineering, and the McGovern Institute (MJ).

526

### 527 **Author Contributions**

|                     | MRK | ARS | RHC | RT | DB | SLN | HS | MJ | LEM | CP |
|---------------------|-----|-----|-----|----|----|-----|----|----|-----|----|
| Conceptualization   |     |     |     |    |    |     |    |    |     |    |
| Funding acquisition |     |     |     |    |    |     |    |    |     |    |
| Investigation       |     |     |     |    |    |     |    |    |     |    |
| Resources           |     |     |     |    |    |     |    |    |     |    |
| Software            |     |     |     |    |    |     |    |    |     |    |
| Tutorials           |     |     |     |    |    |     |    |    |     |    |
| Writing             |     |     |     |    |    |     |    |    |     |    |
| Revision            |     |     |     |    |    |     |    |    |     |    |

528

### 529 **Competing Interests**

530 The authors declare no competing interests.

531

### 532 **References**

533 1. Jun JJ, Steinmetz NA, Siegle JH, Denman DJ, Bauza M, Barbarits B, et al. Fully integrated silicon  
534 probes for high-density recording of neural activity. Nature. 2017 Nov;551(7679):232–6.

- 535 2. Stevenson IH, Kording KP. How advances in neural recording affect data analysis. *Nat Neurosci*. 2011  
536 Feb;14(2):139–42.
- 537 3. Stringer C, Pachitariu M, Steinmetz N, Carandini M, Harris KD. High-dimensional geometry of  
538 population responses in visual cortex. *Nature*. 2019 Jul;571(7765):361–5.
- 539 4. Steinmetz NA, Aydin C, Lebedeva A, Okun M, Pachitariu M, Bauza M, et al. Neuropixels 2.0: A  
540 miniaturized high-density probe for stable, long-term brain recordings. *bioRxiv*. 2020;
- 541 5. Berger M, Agha NS, Gail A. Wireless recording from unrestrained monkeys reveals motor goal  
542 encoding beyond immediate reach in frontoparietal cortex. *Elife*. 2020;9:e51322.
- 543 6. Shenoy KV, Sahani M, Churchland MM. Cortical Control of Arm Movements: A Dynamical Systems  
544 Perspective. *Annu Rev Neurosci*. 2013 Jul 8;36(1):337–59.
- 545 7. Pandarinath C, Ames KC, Russo AA, Farshchian A, Miller LE, Dyer EL, et al. Latent Factors and  
546 Dynamics in Motor Cortex and Their Application to Brain–Machine Interfaces. *J Neurosci*. 2018 Oct  
547 31;38(44):9390–401.
- 548 8. Vyas S, Golub MD, Sussillo D, Shenoy KV. Computation Through Neural Population Dynamics.  
549 *Annual Review of Neuroscience*. 2020;43(1):249–75.
- 550 9. Carnevale F, de Lafuente V, Romo R, Barak O, Parga N. Dynamic Control of Response Criterion in  
551 Premotor Cortex during Perceptual Detection under Temporal Uncertainty. *Neuron*. 2015  
552 May;86(4):1067–77.
- 553 10. Churchland MM, Cunningham JP, Kaufman MT, Foster JD, Nuyujukian P, Ryu SI, et al. Neural  
554 population dynamics during reaching. *Nature*. 2012 Jul;487(7405):51–6.
- 555 11. Harvey CD, Coen P, Tank DW. Choice-specific sequences in parietal cortex during a virtual-navigation  
556 decision task. *Nature*. 2012 Apr;484(7392):62–8.
- 557 12. Kobak D, Brendel W, Constantinidis C, Feierstein CE, Kepecs A, Mainen ZF, et al. Demixed principal  
558 component analysis of neural population data. *eLife*. 2016 Apr 12;5:e10989.
- 559 13. Mante V, Sussillo D, Shenoy KV, Newsome WT. Context-dependent computation by recurrent  
560 dynamics in prefrontal cortex. *Nature*. 2013 Nov;503(7474):78–84.
- 561 14. Pandarinath C, Gilja V, Blabe CH, Nuyujukian P, Sarma AA, Sorice BL, et al. Neural population  
562 dynamics in human motor cortex during movements in people with ALS. *eLife*. 2015 Jun 23;4:e07436.
- 563 15. Remington ED, Narain D, Hosseini EA, Jazayeri M. Flexible Sensorimotor Computations through  
564 Rapid Reconfiguration of Cortical Dynamics. *Neuron*. 2018 Jun;98(5):1005–1019.e5.
- 565 16. Cunningham JP, Yu BM. Dimensionality reduction for large-scale neural recordings. *Nat Neurosci*.  
566 2014 Nov;17(11):1500–9.
- 567 17. Gao Y, Archer E, Paninski L, Cunningham JP. Linear dynamical neural population models through  
568 nonlinear embeddings. *arXiv:160508454 [q-bio, stat] [Internet]*. 2016 Oct 25 [cited 2020 Aug 13];  
569 Available from: <http://arxiv.org/abs/1605.08454>
- 570 18. Hernandez D, Moretti AK, Wei Z, Saxena S, Cunningham J, Paninski L. A novel variational family for  
571 hidden nonlinear markov models. *arXiv preprint arXiv:181102459*. 2018;
- 572 19. Koppe G, Toutounji H, Kirsch P, Lis S, Durstewitz D. Identifying nonlinear dynamical systems via  
573 generative recurrent neural networks with applications to fMRI. *PLoS computational biology*.  
574 2019;15(8):e1007263.
- 575 20. Pandarinath C, O’Shea DJ, Collins J, Jozefowicz R, Stavisky SD, Kao JC, et al. Inferring single-trial  
576 neural population dynamics using sequential auto-encoders. *Nat Methods*. 2018 Oct;15(10):805–15.
- 577 21. She Q, Wu A. Neural dynamics discovery via gaussian process recurrent neural networks. *arXiv*  
578 preprint *arXiv:190700650*. 2019;
- 579 22. Sussillo D, Jozefowicz R, Abbott L, Pandarinath C. LFADS-latent factor analysis via dynamical  
580 systems. *arXiv preprint arXiv:160806315*. 2016;
- 581 23. González J, Dai Z, Hennig P, Lawrence ND. Batch Bayesian Optimization via Local Penalization.  
582 *arXiv:150508052 [stat] [Internet]*. 2015 Oct 14 [cited 2020 Sep 11]; Available from:  
583 <http://arxiv.org/abs/1505.08052>
- 584 24. Li L, Jamieson K, Rostamizadeh A, Gonina E, Hardt M, Recht B, et al. A System for Massively Parallel  
585 Hyperparameter Tuning. *arXiv:181005934 [cs, stat] [Internet]*. 2020 Mar 15 [cited 2020 Sep 11];  
586 Available from: <http://arxiv.org/abs/1810.05934>
- 587 25. Jaderberg M, Dalibard V, Osindero S, Czarnecki WM, Donahue J, Razavi A, et al. Population based  
588 training of neural networks. *arXiv preprint arXiv:171109846*. 2017;



- 589 26. Keshtkaran MR, Pandarinath C. Enabling hyperparameter optimization in sequential autoencoders for  
590 spiking neural data. In: *Advances in Neural Information Processing Systems*. 2019. p. 15937–47.
- 591 27. Chung J, Kastner K, Dinh L, Goel K, Courville AC, Bengio Y. A Recurrent Latent Variable Model for  
592 Sequential Data. In: Cortes C, Lawrence ND, Lee DD, Sugiyama M, Garnett R, editors. *Advances in*  
593 *Neural Information Processing Systems 28* [Internet]. Curran Associates, Inc.; 2015 [cited 2020 Oct 2].  
594 p. 2980–8. Available from: [http://papers.nips.cc/paper/5653-a-recurrent-latent-variable-model-for-](http://papers.nips.cc/paper/5653-a-recurrent-latent-variable-model-for-sequential-data.pdf)  
595 [sequential-data.pdf](http://papers.nips.cc/paper/5653-a-recurrent-latent-variable-model-for-sequential-data.pdf)
- 596 28. Gregor K, Danihelka I, Graves A, Rezende DJ, Wierstra D. DRAW: A Recurrent Neural Network For  
597 Image Generation. arXiv:150204623 [cs] [Internet]. 2015 May 20 [cited 2020 Oct 2]; Available from:  
598 <http://arxiv.org/abs/1502.04623>
- 599 29. Jaderberg M, Czarnecki WM, Dunning I, Marris L, Lever G, Castaneda AG, et al. Human-level  
600 performance in 3D multiplayer games with population-based reinforcement learning. *Science*.  
601 2019;364(6443):859–65.
- 602 30. Gao P, Trautmann E, Yu B, Santhanam G, Ryu S, Shenoy K, et al. A theory of multineuronal  
603 dimensionality, dynamics and measurement. *BioRxiv*. 2017;214262.
- 604 31. O’Doherty JE, Cardoso MMB, Makin JG, Sabes PN. Nonhuman Primate Reaching with Multichannel  
605 Sensorimotor Cortex Electrophysiology [Internet]. Zenodo; 2020 [cited 2020 Aug 21]. Available from:  
606 [https://zenodo.org/record/3854034#.Xz\\_iqpNKhuU](https://zenodo.org/record/3854034#.Xz_iqpNKhuU)
- 607 32. Williams AH, Kim TH, Wang F, Vyas S, Ryu SI, Shenoy KV, et al. Unsupervised Discovery of  
608 Demixed, Low-Dimensional Neural Dynamics across Multiple Timescales through Tensor Component  
609 Analysis. *Neuron*. 2018 Jun;98(6):1099-1115.e8.
- 610 33. Yu BM, Cunningham JP, Santhanam G, Ryu SI, Shenoy KV, Sahani M. Gaussian-Process Factor  
611 Analysis for Low-Dimensional Single-Trial Analysis of Neural Population Activity. *Journal of*  
612 *Neurophysiology*. 2009 Jul;102(1):614–35.
- 613 34. Macke JH, Buesing L, Cunningham JP, Yu BM, Shenoy KV, Sahani M. Empirical models of spiking in  
614 neural populations. In: *Advances in Neural Information Processing Systems*. 2011. p. 9.
- 615 35. Petreska B, Yu BM, Cunningham JP, Santhanam G, Ryu SI, Shenoy KV, et al. Dynamical  
616 segmentation of single trials from population neural data. In: *Advances in Neural Information*  
617 *Processing Systems*. 2011. p. 9.
- 618 36. Buesing L, Macke JH, Sahani M. Spectral learning of linear dynamics from generalised-linear  
619 observations with application to neural population data. In: Pereira F, Burges CJC, Bottou L,  
620 Weinberger KQ, editors. *Advances in Neural Information Processing Systems 25* [Internet]. Curran  
621 Associates, Inc.; 2012 [cited 2020 Aug 26]. p. 1682–90. Available from:  
622 [http://papers.nips.cc/paper/4836-spectral-learning-of-linear-dynamics-from-generalised-linear-](http://papers.nips.cc/paper/4836-spectral-learning-of-linear-dynamics-from-generalised-linear-observations-with-application-to-neural-population-data.pdf)  
623 [observations-with-application-to-neural-population-data.pdf](http://papers.nips.cc/paper/4836-spectral-learning-of-linear-dynamics-from-generalised-linear-observations-with-application-to-neural-population-data.pdf)
- 624 37. Prud’homme MJ, Kalaska JF. Proprioceptive activity in primate primary somatosensory cortex during  
625 active arm reaching movements. *J Neurophysiol*. 1994 Nov;72(5):2280–301.
- 626 38. London BM, Miller LE. Responses of somatosensory area 2 neurons to actively and passively  
627 generated limb movements. *J Neurophysiol*. 2013 Mar;109(6):1505–13.
- 628 39. Chowdhury RH, Glaser JI, Miller LE. Area 2 of primary somatosensory cortex encodes kinematics of  
629 the whole arm. Makin TR, Gold JI, Makin TR, editors. *eLife*. 2020 Jan 23;9:e48198.
- 630 40. Kaas JH, Nelson RJ, Sur M, Lin CS, Merzenich MM. Multiple representations of the body within the  
631 primary somatosensory cortex of primates. *Science*. 1979 May 4;204(4392):521–3.
- 632 41. Jennings VA, Lamour Y, Solis H, Fromm C. Somatosensory cortex activity related to position and  
633 force. *Journal of Neurophysiology*. 1983 May 1;49(5):1216–29.
- 634 42. Nelson RJ. Activity of monkey primary somatosensory cortical neurons changes prior to active  
635 movement. *Brain Res*. 1987 Mar 17;406(1–2):402–7.
- 636 43. Padberg J, Cooke DF, Cerkevich CM, Kaas JH, Krubitzer L. Cortical connections of area 2 and  
637 posterior parietal area 5 in macaque monkeys. *J Comp Neurol*. 2019 15;527(3):718–37.
- 638 44. Cameron AC, Windmeijer FAG. R-Squared Measures for Count Data Regression Models with  
639 Applications to Health-Care Utilization. *Journal of Business & Economic Statistics*. 1996;14(2):209–20.
- 640 45. Felleman DJ, Van Essen DC. Distributed hierarchical processing in the primate cerebral cortex. *Cereb*  
641 *Cortex*. 1991 Feb;1(1):1–47.
- 642 46. Mita A, Mushiake H, Shima K, Matsuzaka Y, Tanji J. Interval time coding by neurons in the

- 643 presupplementary and supplementary motor areas. *Nat Neurosci.* 2009 Apr;12(4):502–7.
- 644 47. Wang J, Narain D, Hosseini EA, Jazayeri M. Flexible timing by temporal scaling of cortical responses.
- 645 *Nat Neurosci.* 2018;21(1):102–10.
- 646 48. Lu X, Matsuzawa M, Hikosaka O. A neural correlate of oculomotor sequences in supplementary eye
- 647 field. *Neuron.* 2002 Apr 11;34(2):317–25.
- 648 49. Chen LL, Wise SP. Neuronal activity in the supplementary eye field during acquisition of conditional
- 649 oculomotor associations. *J Neurophysiol.* 1995 Mar;73(3):1101–21.
- 650 50. Stuphorn V. The role of supplementary eye field in goal-directed behavior. *J Physiol Paris.* 2015
- 651 Jun;109(1–3):118–28.
- 652 51. Sohn H, Narain D, Meirhaeghe N, Jazayeri M. Bayesian Computation through Cortical Latent
- 653 Dynamics. *Neuron.* 2019 Sep 4;103(5):934–947.e5.
- 654 52. Abe T, Kinsella I, Saxena S, Paninski L, Cunningham JP. Neuroscience Cloud Analysis As a Service.
- 655 *bioRxiv.* 2020 Jun 12;2020.06.11.146746.
- 656 53. Li A, Spyra O, Perel S, Dalibard V, Jaderberg M, Gu C, et al. A Generalized Framework for Population
- 657 Based Training. In: *Proceedings of the 25th ACM SIGKDD International Conference on Knowledge*
- 658 *Discovery & Data Mining [Internet].* Anchorage AK USA: ACM; 2019 [cited 2020 Dec 17]. p. 1791–9.
- 659 Available from: <https://dl.acm.org/doi/10.1145/3292500.3330649>
- 660 54. Elskén T, Metzen JH, Hutter F. Neural Architecture Search: A Survey. *arXiv:180805377 [cs, stat]*
- 661 *[Internet].* 2019 Apr 26 [cited 2020 Dec 17]; Available from: <http://arxiv.org/abs/1808.05377>
- 662 55. Kaufman MT, Seely JS, Sussillo D, Ryu SI, Shenoy KV, Churchland MM. The Largest Response
- 663 Component in the Motor Cortex Reflects Movement Timing but Not Movement Type. *eNeuro [Internet].*
- 664 2016 Jul 1 [cited 2020 Dec 28];3(4). Available from:
- 665 <https://www.eneuro.org/content/3/4/ENEURO.0085-16.2016>
- 666 56. Perich MG, Gallego JA, Miller LE. A Neural Population Mechanism for Rapid Learning. *Neuron.* 2018
- 667 Nov 21;100(4):964–976.e7.
- 668 57. Sohn H, Narain D, Meirhaeghe N, Jazayeri M. Bayesian computation through cortical latent dynamics.
- 669 *bioRxiv.* 2018 Nov 8;465419.
- 670

## 671 **Methods**

### 672 **LFADS architecture and training**

673 A detailed overview of the LFADS model is given in (20). Briefly: at the input to the model, a pair of bidirectional RNN

674 encoders read over the spike sequence and produce initial conditions for the generator RNN and time-varying inputs for

675 the controller RNN. All RNNs were implemented using gated recurrent unit (GRU) cells. At each time step, the generator

676 state evolves with input from the controller and the controller receives delayed feedback from the generator. The

677 generator states are linearly mapped to factors, which are mapped to the firing rates of the original neurons using a

678 linear mapping followed by an exponential. The optimization objective is to minimize the negative log-likelihood of the

679 data given the inferred firing rates, and includes KL and L2 regularization penalties.

680

681 Identical architecture and training hyperparameter values were used for most runs, with a few deviations. We used a

682 generator dimension of 100, initial condition dimension of 100 (50 for area 2 runs), initial condition encoder dimension

683 of 100, factor dimension of 40, controller and controller input encoder dimension of 80 (64 for DMFC runs), and controller

684 output dimension of 4 (10 for overfitting runs).

685

686 We used the Adam optimizer with an initial learning rate of 0.01 and, for non-AutoLFADS runs, decayed the learning

687 rate by a factor of 0.95 after every 6 consecutive epochs with no improvement to the validation loss. Training was halted

688 for these runs when the learning rate reached 1e-5. The loss was scaled by a factor of 1e4 immediately before

689 optimization for numerical stability. GRU cell hidden states were clipped at 5 and the global gradient norm was clipped

690 at 200 to avoid occasional pathological training.

691

692 We used a trainable mean initialized to 0 and fixed variance of 0.1 for the Gaussian initial condition prior and set a

693 minimum allowable variance of 1e-4 for the initial condition posterior. The controller output prior was autoregressive with

694 a trainable autocorrelation tau and noise variance, initialized to 10 and 0.1, respectively.

695

696 Memory usage for RNNs is highly dependent on the sequence length, so batch size was varied accordingly (100 for  
697 maze and random target datasets, 500 for synthetic and area 2 datasets, and 300/400 for the DMFC dataset). KL and  
698 L2 regularization penalties were linearly ramped to their full weight during the first 80 epochs for most runs to avoid local  
699 minima induced by high initial regularization penalties. Exceptions were the runs on synthetic data, which were ramped  
700 over 70 epochs and random searches on area 2 and DMFC datasets, which used step-wise ramping over the first 400  
701 steps.

702  
703 Random searches and AutoLFADS runs used the architecture parameters described above, along with regularization  
704 HPs sampled from ranges (or initialized with constant values) given in **Supp. Table 2**. Most runs used a default set of  
705 ranges, with a few exceptions outlined in the table. Dropout was sampled from a uniform distribution and KL and L2  
706 weight HPs were sampled from log-uniform distributions.

707  
708 During PBT, weights were used to control maximum and minimum perturbation magnitudes for different HPs (e.g. a  
709 weight of 0.3 results in perturbation factors between 0.7 and 1.3). The dropout and CD HPs used a weight of 0.3 and KL  
710 and L2 penalty HPs used a weight of 0.8. CD rate, dropout rate, and learning rate were limited to their specified ranges,  
711 while the KL and L2 penalties could be perturbed outside of the initial ranges. Each generation of PBT consisted of 50  
712 training epochs. AutoLFADS training was stopped when the best smoothed validation NLL improved by less than 0.05%  
713 over the course of four generations.

714  
715 Validation NLL was exponentially smoothed with  $\alpha = 0.7$  during training. For non-AutoLFADS runs, the model checkpoint  
716 with the lowest smoothed validation NLL was used for inference. For AutoLFADS runs, the checkpoint with the lowest  
717 smoothed validation NLL in the last epoch of any generation was used for inference. Firing rates were inferred 50 times  
718 for each model using different samples from initial condition and controller output posteriors. These estimates were then  
719 averaged, resulting in the final inferred rates for each model.

## 720 721 **Overfitting on synthetic data**

722 Synthetic data were generated using a 2-input chaotic vanilla RNN ( $\gamma = 1.5$ ) as described in the original LFADS work  
723 (20,22). The only modification was that the inputs were white Gaussian noise. In brief, the 50-unit RNN was run for 1  
724 second (100 time steps) starting from 400 different initial conditions to generate ground-truth Poisson rates for each  
725 condition. These distributions were sampled 10 times for each condition, resulting in 4000 spiking trials. Of these trials,  
726 80% (3200 trials) were used for LFADS training and the final 20% (800 trials) were used for validation.

727  
728 We sampled 200 HP combinations from the distributions specified in **Supp. Table 2** and used them to train LFADS  
729 models on the synthetic dataset. We then trained 200 additional models with the same set of HPs using a CD rate of 0.3  
730 (i.e., using 70% of data as input and remaining 30% for likelihood evaluation) (26). The coefficient of determination  
731 between inferred and ground truth rates was computed across all samples and neurons on the 800-sample validation  
732 set.

## 733 734 **M1 maze task**

735 We used the previously-collected maze dataset (55) described in detail in the original LFADS work (20). Briefly, a male  
736 macaque monkey performed a two-dimensional center-out reaching task by guiding a cursor to a target without touching  
737 any virtual barriers while neural activity was recorded via two 92-electrode arrays implanted into M1 and dorsal PMd.  
738 The full dataset consisted of 2,296 trials, 108 reach conditions, and 202 single units.

739  
740 The spiking data were binned at 1 ms and smoothed by convolution with a Gaussian kernel (30 ms s.d.). Hand velocities  
741 were computed using second order accurate central differences from hand position at 1kHz. An antialiasing filter was  
742 applied to hand velocities and all data were then resampled to 2 ms. Trials were created by aligning the data to 250 ms  
743 before and 450 ms after movement onset, as calculated in the original paper.

744  
745 Datasets of varying sizes were created for LFADS by randomly selecting trials with 20, 10, and 5% of the original dataset  
746 using seven fixed seeds, and then splitting each of these into 80/20 training and validation sets for LFADS (22 total,  
747 including the full dataset). As a baseline for each data subset, we trained LFADS models with fixed HPs that had been

748 previously found to result in high-performing models for this dataset, with the exception of controller input encoder and  
749 controller dimensionalities (see *LFADS architecture and training* and **Supp. Table 2**). We increased the dimensionality  
750 of these components to allow improved generalization to the datasets from more input-driven areas while keeping the  
751 architecture consistent across all datasets. We also trained AutoLFADS models (40 workers) on each subset using the  
752 search space given in **Supp. Table 2**. Additionally, we ran a random search using 100 HPs sampled from the AutoLFADS  
753 search space on one of the 230-trial datasets.

754  
755 We used rates from spike smoothing, manually tuned LFADS models, random search LFADS models, and AutoLFADS  
756 models to predict  $x$  and  $y$  hand velocity delayed by 90 ms using ridge regression with a regularization penalty of  $\lambda = 1$ .  
757 Each data subset was further split into 80/20 training and validation sets for decoding. To account for the difficulty of  
758 modeling the first few time points of each trial with LFADS, we discarded data from the first 50 ms of each trial and did  
759 not use that data for model evaluation. Decoding performance was evaluated by computing the coefficient of  
760 determination for predicted and true velocity across all trials for each velocity dimension. The result was then averaged  
761 across the two velocity dimensions.

762  
763 To evaluate PSTH reconstruction for random search and AutoLFADS models, we first computed the empirical PSTHs  
764 by averaging smoothed spikes from the full 2296-trial dataset across all 108 conditions. We then computed model PSTHs  
765 by averaging inferred rates across conditions for all trials in the 230-trial subset. We computed the coefficient of  
766 determination between model-inferred PSTHs and empirical PSTHs for each neuron across all conditions in the subset.  
767 We then averaged the result across all neurons.

#### 768 **M1 random target task**

769 The random target dataset consists of neural recordings and hand position data recorded from macaque M1 during a  
770 self-paced, sequential reaching task between random elements of a grid (31). For our experiments, we used only the  
771 first 30% (approx. 9 minutes) of the dataset recorded from Indy on 04/26/2016.

772  
773  
774 We started with sorted units obtained from M1 and binned their spike times at 1 ms. To avoid artifacts in which the same  
775 spikes appeared on multiple channels, we computed cross-correlations between all pairs of neurons over the first 10 sec  
776 and removed individual correlated neurons ( $n = 34$ ) by highest firing rate until there were no pairs with correlation above  
777 0.0625, resulting in 181 uncorrelated neurons. The position data were provided at 250 Hz, so we upsampled these data  
778 to 1 kHz using cubic interpolation. We smoothed the spikes by convolving with a Gaussian kernel (50 ms s.d.), applied  
779 an antialiasing filter to hand velocities, and downsampled to 2 ms. The continuous neural spiking data were chopped  
780 into overlapping segments of length 600 ms, where each segment shared its last 200 ms with the first 200 ms of the  
781 next. The resulting 1321 segments were split into 80/20 training and validation sets for LFADS, where the validation  
782 segments were chosen in blocks of 3 to minimize the overlap between training and validation subsets.

783  
784 The chopped segments were used to train an AutoLFADS model and to run a random search using 100 HPs sampled  
785 from the AutoLFADS search space. After modeling, the chopped data were merged using a quadratic weighting of  
786 overlapping regions that placed more weight on the rates inferred at the ends of the segments. The merging technique  
787 weighted the ends of segments as  $w = 1 - x^2$  and the beginnings of segments as  $1 - w$ , with  $x$  ranging from 0 to 1  
788 across the overlapping points. After weights were applied, overlapping points were summed, resulting in a continuous  
789 ~9-minute stretch of modeled data.

790  
791 We computed hand velocity from position using second-order accurate central differences and introduced a 120 ms  
792 delay between neural data and kinematics. We used ridge regression ( $\lambda = 1e - 5$ ) to predict hand velocity across the  
793 continuous data using smoothed spikes, random search LFADS rates, and AutoLFADS rates. We computed coefficient  
794 of determination for each velocity dimension individually and then averaged the two velocity dimensions to compute  
795 decoding performance.

796  
797 To prepare the data for subspace visualization, the continuous activity for each neuron was soft-normalized by  
798 subtracting its mean and dividing by its 90th quantile plus an offset of 0.01. Trials were identified in the continuous data  
799 as the intervals over which target positions were constant (314 trials). To identify valid trials, we computed the normalized

800 distance from the final position. Trials were removed if the cursor exceeded 5% of this original distance or overshot by  
801 5%. Thresholds ( $n = 100$ ) were also created between 25 and 95% of the distance and trials were removed if they crossed  
802 any of those thresholds more than once. We then computed an alignment point at 90% of the distance from the final  
803 position for the remaining trials and labeled it as movement onset (227 trials). For each of these trials, data were aligned  
804 to 400 ms before and 500 ms after movement onset. The first principal component of AutoLFADS rates during aligned  
805 trials was computed and activation during the first 100 ms of each trial was normalized to  $[0,1]$ . Trials were rejected if  
806 activation peaked after 100 ms or the starting activation was more than 3 standard deviations from the mean. The PC1  
807 onset alignment point was calculated as the first time that activity in the first principal component crossed 50% of its  
808 maximum in the first 100 ms (192 trials). This alignment point was used for all neural subspace analyses.

809  
810 Movement-relevant subspaces were extracted by ridge regression from neural activity onto x-velocity, y-velocity, and  
811 speed. Similarly, position-relevant subspaces involved regression from neural activity onto x-position and y-position. For  
812 movement and position subspaces, neural and behavioral data were aligned to 200 ms before and 1000 ms after PC1  
813 onset. Target subspaces were computed by regressing neural activity onto time series that represented relative target  
814 positions. As with the movement and position subspaces, the time series spanned 200 ms before to 1000 ms after PC1  
815 onset. A boxcar window was used to confine the relative target position information to the time period spanning 0 to 200  
816 ms after PC1 onset, and the rest of the window was zero-filled. For kinematic prediction from neural subspaces, we used  
817 a delay of 120 ms and 80/20 trial-wise training and validation split. For each behavioral variable and neural data type, a  
818 5-fold cross-validated grid search ( $n = 100$ ) was used on training data to find the best-performing regularization across  
819 orders of magnitude between  $1e-5$  and  $1e4$ .

820  
821 Single subspace dimensions were aligned to 200 ms before and 850 ms after PC1 onset for plotting. Subspace  
822 activations were calculated by computing the norm of activations across all dimensions of the subspace and then  
823 rescaling the min and max activations to 0 and 1, respectively. Multidimensional subspace plots for the movement  
824 subspace were aligned to 180 ms before and 620 ms after PC1 onset and for target subspace 180 ms before and 20  
825 ms after.

## 826 827 **Area 2 bump task**

828 The sensory dataset consisted of two recording sessions during which a monkey moved a manipulandum to direct a  
829 cursor towards one of eight targets (active trials). During passive trials, the manipulandum induced a mechanical  
830 perturbation to the monkey's hand prior to the reach. Activity was recorded via an intracortical electrode array embedded  
831 in Brodmann's area 2 of the somatosensory cortex. For the second session, joint angles were calculated from motion  
832 tracking data collected throughout the session. The first session was used for PSTH, GLM, subspace, and velocity  
833 decoding analyses and the second session was only used for pseudo- $R^2$  comparison to GLM and joint angle decoding.  
834 More details on the task and dataset are given in the original paper (39).

835  
836 For both sessions, only sorted units were used. Spikes were binned at 1 ms and neurons that were correlated over the  
837 first 1000 sec were removed ( $n = 2$  for each session) as described for the random target task, resulting in 53 and 68  
838 neurons in the first and second sessions, respectively. Spikes were then rebinned to 5 ms and the continuous data were  
839 chopped into 500 ms segments with 200 ms of overlap. Segments that did not include data from rewarded trials were  
840 discarded (kept 9,626 for the first session and 7,038 for the second session). A subset of the segments (30%) were  
841 further split into training and validation data (80/20) for LFADS. An AutoLFADS model (32 workers) was trained on each  
842 session and a random search (96 models) was performed on the first session. After modeling, LFADS rates were then  
843 reassembled into their continuous form, with linear merging of overlapping data points.

844  
845 Empirical PSTHs were computed by convolving spikes binned at 1 ms with a half-Gaussian (10 ms s.d.), rebinning to 5  
846 ms, and then averaging across all trials within a condition. LFADS PSTHs were computed by similarly averaging LFADS  
847 rates. Passive trials were aligned 100 ms before and 500 ms after the time of perturbation, and active trials were aligned  
848 to the same window around an acceleration-based movement onset (39). Neurons with firing rates lower than 1 Hz were  
849 excluded from the PSTH analysis. To quantitatively evaluate PSTH reconstruction, the coefficient of determination was  
850 computed for each neuron and passive condition in the four cardinal directions, and these numbers were averaged for  
851 each model.

852

853 As a baseline for how well AutoLFADS could reconstruct neural activity, we fit generalized linear models (GLMs) to each  
854 individual neuron's firing rate, based on the position and velocity of and forces on the hand (see Chowdhury et al., 2020  
855 for details of the hand kinematic-force GLM). Notably, in addition to fitting GLMs using the concurrent behavioral  
856 covariates, we also added 10 bins of behavioral history (50 ms) to the GLM covariates, increasing the number of GLM  
857 parameters almost tenfold. Furthermore, because we wanted to find the performance ceiling of a behavioral-encoder-  
858 based GLMs to compare with the dynamics-based AutoLFADS, we purposefully did not cross-validate the GLMs.  
859 Instead, we simply evaluated GLM fits on data used to train the model.

860

861 To evaluate AutoLFADS and GLMs individually, we used the pseudo- $R^2$  ( $pR^2$ ), a goodness-of-fit metric adapted for the  
862 Poisson-like statistics of neural activity. Like variance-accounted-for and  $R^2$ ,  $pR^2$  has a maximum value of 1 when a  
863 model perfectly predicts the data, and a value of 0 when a model predicts as well as a single parameter mean model.  
864 Negative values indicate predictions that are worse than a mean model. For each neuron, we compared the  $pR^2$  of the  
865 AutoLFADS model to that of the GLM (Fig 5e). To determine statistically whether AutoLFADS performed better than  
866 GLMs, we used the relative- $pR^2$  ( $rpR^2$ ) metric, which compares the two models against each other, rather than to a mean  
867 model (see Perich et al., 2018 for full description of  $pR^2$  and  $rpR^2$ ). In this case, a  $rpR^2$  value above 0 indicated that  
868 AutoLFADS outperformed the GLM (indicated by filled circles in Fig 5e). We assessed significance using a bootstrapping  
869 procedure, after fitting both AutoLFADS and GLMs on the data. On each bootstrap iteration, we drew a number of trials  
870 from the session (with replacement) equal to the total number of trials in the session, evaluating the  $rpR^2$  on this set of  
871 trials as one bootstrap sample. We repeated this procedure 100 times. We defined neurons for which at least 95 of these  
872  $rpR^2$  samples were greater than 0 as neurons that were predicted better by AutoLFADS than a GLM. Likewise, neurons  
873 for which at least 95 of these samples were below 0 would have been defined as neurons predicted better by GLM  
874 (though there were no neurons with this result).

875

876 For the subspace analysis, spikes were smoothed by convolution with a Gaussian (50 ms s.d.) and then rebinned to 50  
877 ms. Neural activity was scaled using the same soft-normalization approach outlined for the random target task subspace  
878 analysis. Movement onset was calculated using the acceleration-based movement onset approach for both active and  
879 passive trials. For decoder training, trials were aligned to 100 ms before to 600 ms after movement onset. For plotting,  
880 trials were aligned to 50 ms before and 600 ms after movement onset. The data for successful reaches in the four  
881 cardinal directions was divided into 80/20 trial-wise training and validation partitions. Separate ridge regression models  
882 were trained to predict each hand velocity dimension for active and passive trials using neural activity delayed by 50 ms  
883 (total 4 decoders). The regularization penalty was determined through a 5-fold cross validated grid search of 25 values  
884 from the same range as the random target task subspace decoders.

885

886 For hand velocity decoding, spikes during active trials were smoothed by convolution with a half-Gaussian (50 ms s.d.)  
887 and neural activity was delayed by 100 ms relative to kinematics. The data were aligned to 200 ms before and 1200 ms  
888 after movement onset and trials were split into 80/20 training and validation sets. Simple regression was used to estimate  
889 kinematics from neural activity and the coefficient of determination was computed and averaged across x- and y-velocity.

890

891 GPFA was performed on segments from all rewarded trials using a latent dimension of 20 and Gaussian smoothing  
892 kernel (30 ms s.d.). Decoding data were extracted by aligning data from active trials to 200 ms before and 500 ms after  
893 movement onset. Data were split into 80/20 training and validation sets and neural activity was lagged 100 ms behind  
894 kinematics. Ridge regression ( $\lambda = 0.001$ ) was used to decode all joint angle velocities from smoothed spikes (half-  
895 Gaussian, 50 ms kernel s.d.), rates inferred by GPFA, and rates inferred by AutoLFADS.

896

### 897 **DMFC timing task**

898 The cognitive dataset consisted of one session of recordings from the dorsomedial frontal cortex (DMFC) while a monkey  
899 performed a time interval reproduction task. The monkey was presented with a "Ready" visual stimulus to indicate the  
900 start of the interval and a second "Set" visual stimulus to indicate the end of the sample timing interval,  $t_s$ . Following the  
901 Set stimulus, the monkey made a response ("Go") so that the production interval ( $t_p$ ) between Set and Go matches the  
902 corresponding  $t_s$ . The animal responded with either a saccadic eye movement or a joystick manipulation to the left or  
903 right depending on the location of a peripheral target. The two response modalities, combined with 10 timing conditions

904 ( $t_s$ ) and two target locations, led to a total of 40 task conditions. A more detailed description of the task is available in the  
905 original paper (57).

906

907 To prepare the data for LFADS, the spikes from sorted units were binned at 20 ms. To avoid artifacts from correlated  
908 spiking activity, we computed cross-correlations between all pairs of neurons for the duration of the experiment and  
909 sequentially removed individual neurons ( $n = 8$ ) by the number of above-threshold correlations until there were no pairs  
910 with correlation above 0.2, resulting in 45 uncorrelated neurons. Data between the “Ready” cue and the trial end was  
911 chopped into 2600 ms segments with no overlap. The first chop for each trial was randomly offset by between 0 and 100  
912 ms to break any link between trial start times and chop start times. The resulting neural data segments (1659 total) were  
913 split into 80/20 training and validation sets for LFADS. An AutoLFADS model (32 workers) and random search (96  
914 models) were trained on these segments (see **Supp. Table 2**).

915

916 For all analyses of smoothed spikes, smoothing was performed by convolving with a Gaussian kernel (widths described  
917 below) at 1 ms resolution.

918

919 Empirical PSTHs were computed by trial-averaging smoothed spikes (25 ms kernel s.d., 20 ms bins) within each of the  
920 40 conditions. LFADS PSTHs were computed by similarly averaging LFADS rates. The coefficient of determination was  
921 computed between inferred and empirical PSTHs across all neurons and time steps during the “Ready-Set” and “Set-  
922 Go” periods for each condition and then averaged across periods and conditions.

923

924 To visualize low-dimensional neural trajectories, demixed principal component analysis (dPCA; Kobak et al., 2016) was  
925 performed on smoothed spikes (40 ms kernel s.d., 20 ms bins) and AutoLFADS rates during the “Ready-Set” period.  
926 The two conditions used were rightward and leftward hand movements with  $t_s = 1000$  ms.

927

928 Besides LFADS/AutoLFADS, three alternate methods were applied for speed-tp correlation comparisons: spike  
929 smoothing, GPFA, and PCA. For spike smoothing, analyses were performed by smoothing with a 40 ms s.d.. For GPFA,  
930 a model was trained on the concatenated training and validation sets with a latent dimension of 9. Principal component  
931 analysis (PCA) was performed on smoothed spikes (40 ms kernel s.d., 20 ms bins) and 5-7 top PCs that explained more  
932 than 75% of data variance across conditions were included in the later analysis.

933

934 Neural speed was calculated by computing distances between consecutive time bins in a multidimensional state space  
935 and then averaging the distances across the time bins for the production epoch. The number of dimensions used to  
936 compute the neural speed was 45, 5-7, 9, and 45 for smoothing, PCA, GPFA and LFADS, respectively. The Pearson’s  
937 correlation coefficient between neural speed and the produced time interval was computed across trials within each  
938 condition.
